# Supplementary material for: Spin Polarization and Flat Bands in Eu-Doped Nanoporous and Twisted Bilayer Graphenes
Source: MDPI journal article supplement (doi:10.3390/mi14101889), 2023-09-30
Supplement: s1 [file s1]

# **Spin Polarization and Flat Bands in Eu-doped nanoporous and twisted bilayer graphenes**

Iu. A. Melchakova, G. T. Oyeniyi, S. P. Polyutov and P. V. Avramov

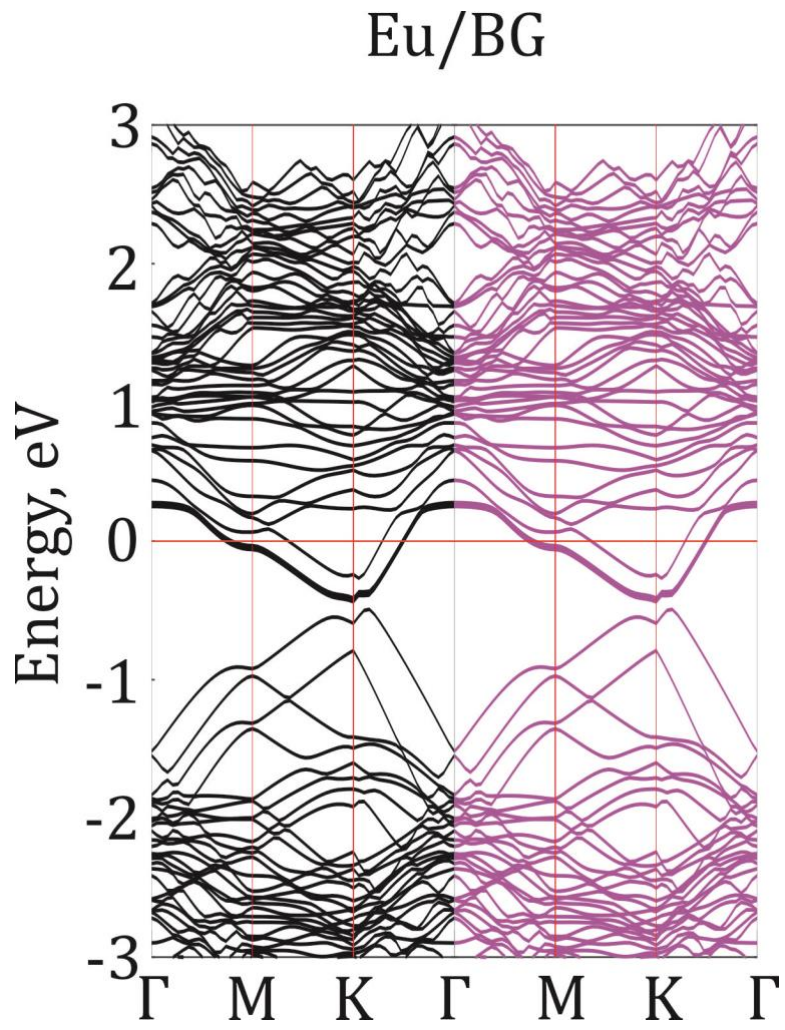

**Figure S1.** The band structure of Eu/BG heterostructure. Spin-up ( $\alpha$ ) bands are depicted in black, and spin-down ( $\beta$ ) bands are depicted in purple

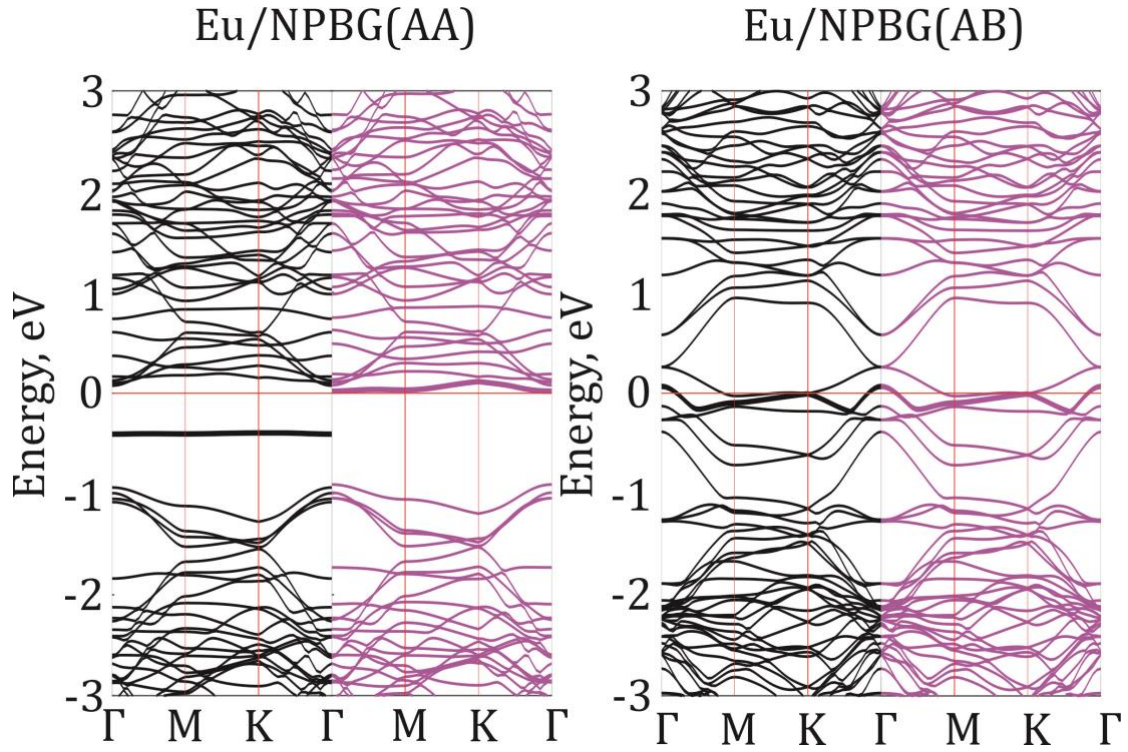

**Figure S2.** The band structure of Eu/NPBG heterostructures. Spin-up ( $\alpha$ ) bands are depicted in black, and spin-down ( $\beta$ ) bands are depicted in purple

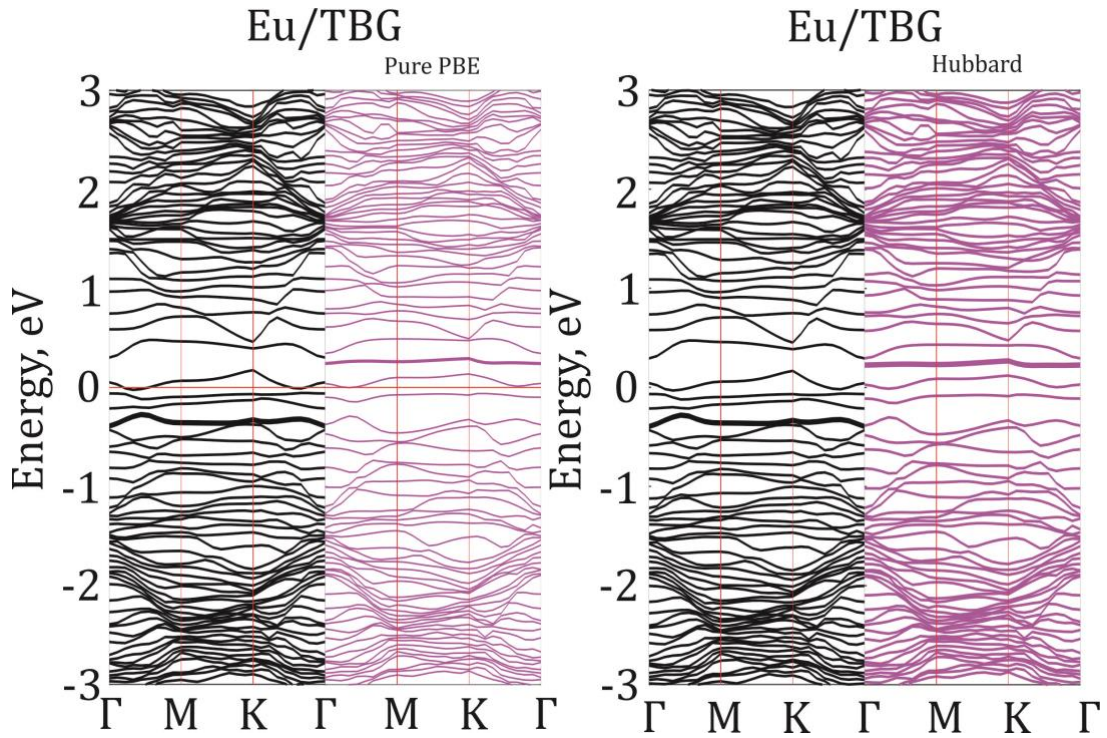

**Figure S3.** The band structure of Eu/TBG heterostructures calculated at GGA PBE (left panel) and GGA PBE+U (right panel) levels of theory. Spin-up ( $\alpha$ ) bands are depicted in black, and spin-down ( $\beta$ ) bands are depicted in purple

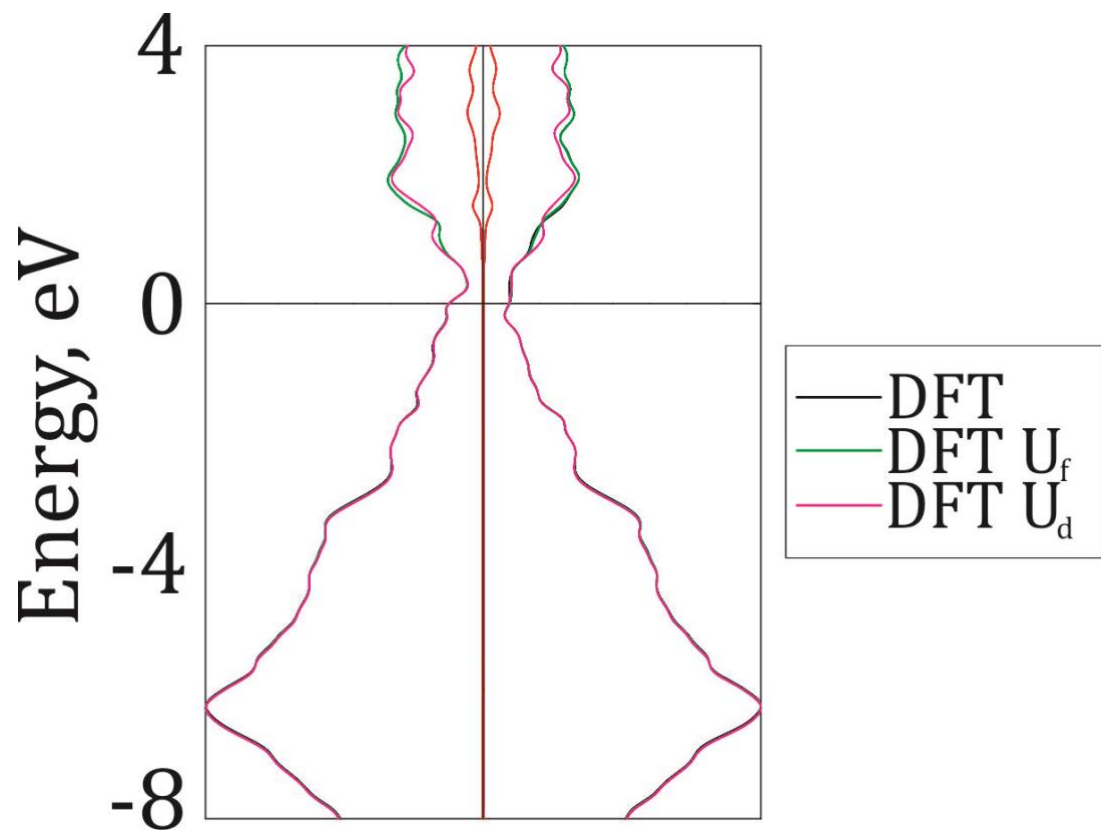

**Figure S4.** Total density of states (TDOS) of Eu/TBG calculated using DFT (black curve), DFT+U with  $f$ -electrons treated by Dudarev method (green curve), and DFT+U with  $d$ -electrons treated by Dudarev method (purple curve)

# 1. Eu-BG(AA).cif

#=====

# CRYSTAL DATA

#-----

data\_VESTA\_phase\_1

\_chemical\_name\_common 'Eu/BG (AA) '

\_cell\_length\_a 17.259382

\_cell\_length\_b 17.257092

\_cell\_length\_c 31.364382

\_cell\_angle\_alpha 93.774475

\_cell\_angle\_beta 101.447136

\_cell\_angle\_gamma 120.034439

\_cell\_volume 7774.917192

\_space\_group\_name\_H-M\_alt 'P 1'

\_space\_group\_IT\_number 1

loop\_

\_space\_group\_symop\_operation\_xyz

'x, y, z'

loop\_

\_atom\_site\_label

\_atom\_site\_occupancy

\_atom\_site\_fract\_x

\_atom\_site\_fract\_y

\_atom\_site\_fract\_z

\_atom\_site\_adp\_type

\_atom\_site\_U\_iso\_or\_equiv

\_atom\_site\_type\_symbol

|     |     |           |           |          |          |
|-----|-----|-----------|-----------|----------|----------|
| C1  | 1.0 | 0.613777  | 0.734445  | 0.192903 | Uiso ? C |
| C2  | 1.0 | -0.119902 | -0.095197 | 0.075494 | Uiso ? C |
| C3  | 1.0 | -0.338060 | -0.169905 | 0.193797 | Uiso ? C |
| C4  | 1.0 | -0.072533 | -0.000185 | 0.074961 | Uiso ? C |
| C5  | 1.0 | -0.243571 | 0.734237  | 0.192274 | Uiso ? C |
| C6  | 1.0 | 0.019393  | 0.902201  | 0.069917 | Uiso ? C |
| C7  | 1.0 | -0.195148 | -0.169931 | 0.193597 | Uiso ? C |
| C8  | 1.0 | 0.065484  | -0.003443 | 0.067028 | Uiso ? C |
| C9  | 1.0 | -0.099095 | 0.735417  | 0.195086 | Uiso ? C |
| C10 | 1.0 | 0.160002  | 0.900173  | 0.065277 | Uiso ? C |
| C11 | 1.0 | -0.050340 | -0.168499 | 0.197124 | Uiso ? C |
| C12 | 1.0 | 0.204025  | -0.007264 | 0.058541 | Uiso ? C |
| C13 | 1.0 | 0.045937  | 0.737044  | 0.199199 | Uiso ? C |
| C14 | 1.0 | 0.306485  | 0.902672  | 0.071150 | Uiso ? C |
| C15 | 1.0 | 0.095148  | -0.166640 | 0.202400 | Uiso ? C |
| C16 | 1.0 | 0.353386  | -0.002460 | 0.069606 | Uiso ? C |
| C17 | 1.0 | 0.189561  | 0.737556  | 0.200582 | Uiso ? C |
| C18 | 1.0 | 0.452368  | -0.094715 | 0.076855 | Uiso ? C |
| C19 | 1.0 | 0.238928  | -0.166146 | 0.203720 | Uiso ? C |
| C20 | 1.0 | 0.500140  | 0.000660  | 0.077321 | Uiso ? C |
| C21 | 1.0 | 0.331321  | 0.736808  | 0.198669 | Uiso ? C |

|     |     |           |           |          |          |
|-----|-----|-----------|-----------|----------|----------|
| C22 | 1.0 | 0.596275  | -0.093902 | 0.078806 | Uiso ? C |
| C23 | 1.0 | 0.379984  | -0.167259 | 0.200458 | Uiso ? C |
| C24 | 1.0 | 0.644346  | 0.001661  | 0.079668 | Uiso ? C |
| C25 | 1.0 | 0.472411  | 0.735560  | 0.195612 | Uiso ? C |
| C26 | 1.0 | 0.738840  | -0.094100 | 0.078207 | Uiso ? C |
| C27 | 1.0 | 0.520580  | -0.168792 | 0.196550 | Uiso ? C |
| C28 | 1.0 | 0.786741  | 0.001311  | 0.078691 | Uiso ? C |
| C29 | 1.0 | 0.615298  | -0.121572 | 0.195586 | Uiso ? C |
| C30 | 1.0 | -0.118703 | 0.048471  | 0.077511 | Uiso ? C |
| C31 | 1.0 | -0.336342 | -0.025838 | 0.196904 | Uiso ? C |
| C32 | 1.0 | -0.070583 | 0.144064  | 0.078479 | Uiso ? C |
| C33 | 1.0 | -0.242615 | -0.122141 | 0.194076 | Uiso ? C |
| C34 | 1.0 | 0.020679  | 0.046163  | 0.071646 | Uiso ? C |
| C35 | 1.0 | -0.194074 | -0.026273 | 0.195740 | Uiso ? C |
| C36 | 1.0 | 0.069031  | 0.141965  | 0.073060 | Uiso ? C |
| C37 | 1.0 | -0.098581 | -0.121338 | 0.196051 | Uiso ? C |
| C38 | 1.0 | 0.157388  | 0.041950  | 0.061250 | Uiso ? C |
| C39 | 1.0 | -0.049765 | -0.025229 | 0.198322 | Uiso ? C |
| C40 | 1.0 | 0.208502  | 0.139620  | 0.066984 | Uiso ? C |
| C41 | 1.0 | 0.047140  | -0.119268 | 0.201697 | Uiso ? C |
| C42 | 1.0 | 0.302869  | 0.042940  | 0.063943 | Uiso ? C |
| C43 | 1.0 | 0.096576  | -0.022596 | 0.205521 | Uiso ? C |
| C44 | 1.0 | 0.353240  | 0.140435  | 0.069318 | Uiso ? C |
| C45 | 1.0 | 0.192404  | -0.117755 | 0.206143 | Uiso ? C |
| C46 | 1.0 | 0.451173  | 0.047296  | 0.074771 | Uiso ? C |
| C47 | 1.0 | 0.243042  | -0.020585 | 0.211944 | Uiso ? C |

|     |     |           |           |          |          |
|-----|-----|-----------|-----------|----------|----------|
| C48 | 1.0 | 0.499972  | 0.143342  | 0.076938 | Uiso ? C |
| C49 | 1.0 | 0.334353  | -0.118420 | 0.203988 | Uiso ? C |
| C50 | 1.0 | 0.596646  | 0.049235  | 0.079655 | Uiso ? C |
| C51 | 1.0 | 0.383956  | -0.021928 | 0.207135 | Uiso ? C |
| C52 | 1.0 | 0.645137  | 0.145079  | 0.081264 | Uiso ? C |
| C53 | 1.0 | 0.474533  | -0.120135 | 0.199254 | Uiso ? C |
| C54 | 1.0 | 0.739824  | 0.049460  | 0.080040 | Uiso ? C |
| C55 | 1.0 | 0.523024  | -0.024301 | 0.200769 | Uiso ? C |
| C56 | 1.0 | 0.788144  | 0.145160  | 0.081337 | Uiso ? C |
| C57 | 1.0 | 0.617274  | 0.022654  | 0.199076 | Uiso ? C |
| C58 | 1.0 | -0.116850 | 0.192621  | 0.080867 | Uiso ? C |
| C59 | 1.0 | -0.334705 | 0.118128  | 0.199769 | Uiso ? C |
| C60 | 1.0 | -0.068583 | 0.288319  | 0.082008 | Uiso ? C |
| C61 | 1.0 | -0.241231 | 0.021697  | 0.196656 | Uiso ? C |
| C62 | 1.0 | 0.023737  | 0.191048  | 0.076926 | Uiso ? C |
| C63 | 1.0 | -0.192979 | 0.117348  | 0.197806 | Uiso ? C |
| C64 | 1.0 | 0.072365  | 0.286962  | 0.078687 | Uiso ? C |
| C65 | 1.0 | -0.097955 | 0.021999  | 0.197323 | Uiso ? C |
| C66 | 1.0 | 0.163589  | 0.189025  | 0.071843 | Uiso ? C |
| C67 | 1.0 | -0.049678 | 0.117687  | 0.198597 | Uiso ? C |
| C68 | 1.0 | 0.213334  | 0.285545  | 0.075449 | Uiso ? C |
| C69 | 1.0 | 0.047545  | 0.024049  | 0.202612 | Uiso ? C |
| C70 | 1.0 | 0.305777  | 0.188532  | 0.070016 | Uiso ? C |
| C71 | 1.0 | 0.095726  | 0.119760  | 0.203617 | Uiso ? C |
| C72 | 1.0 | 0.355957  | 0.285375  | 0.075037 | Uiso ? C |
| C73 | 1.0 | 0.194978  | 0.027436  | 0.212044 | Uiso ? C |

|     |     |           |          |          |          |
|-----|-----|-----------|----------|----------|----------|
| C74 | 1.0 | 0.451456  | 0.190255 | 0.075377 | Uiso ? C |
| C75 | 1.0 | 0.243502  | 0.123977 | 0.212840 | Uiso ? C |
| C76 | 1.0 | 0.500781  | 0.286772 | 0.078815 | Uiso ? C |
| C77 | 1.0 | 0.339486  | 0.027665 | 0.212473 | Uiso ? C |
| C78 | 1.0 | 0.597185  | 0.192464 | 0.080826 | Uiso ? C |
| C79 | 1.0 | 0.387842  | 0.124017 | 0.212902 | Uiso ? C |
| C80 | 1.0 | 0.645940  | 0.288515 | 0.082884 | Uiso ? C |
| C81 | 1.0 | 0.477711  | 0.024797 | 0.204476 | Uiso ? C |
| C82 | 1.0 | 0.741109  | 0.193232 | 0.082530 | Uiso ? C |
| C83 | 1.0 | 0.525519  | 0.120210 | 0.204729 | Uiso ? C |
| C84 | 1.0 | 0.789511  | 0.289032 | 0.083876 | Uiso ? C |
| C85 | 1.0 | 0.618756  | 0.166542 | 0.201597 | Uiso ? C |
| C86 | 1.0 | -0.115308 | 0.336617 | 0.083638 | Uiso ? C |
| C87 | 1.0 | -0.334238 | 0.261349 | 0.200525 | Uiso ? C |
| C88 | 1.0 | -0.067511 | 0.432021 | 0.083840 | Uiso ? C |
| C89 | 1.0 | -0.240074 | 0.165356 | 0.198749 | Uiso ? C |
| C90 | 1.0 | 0.026088  | 0.335523 | 0.080999 | Uiso ? C |
| C91 | 1.0 | -0.192342 | 0.260656 | 0.198927 | Uiso ? C |
| C92 | 1.0 | 0.074053  | 0.431024 | 0.081536 | Uiso ? C |
| C93 | 1.0 | -0.097520 | 0.165161 | 0.198213 | Uiso ? C |
| C94 | 1.0 | 0.167158  | 0.334208 | 0.077964 | Uiso ? C |
| C95 | 1.0 | -0.049627 | 0.260580 | 0.198690 | Uiso ? C |
| C96 | 1.0 | 0.215529  | 0.429961 | 0.079245 | Uiso ? C |
| C97 | 1.0 | 0.046645  | 0.166157 | 0.200605 | Uiso ? C |
| C98 | 1.0 | 0.308965  | 0.333473 | 0.076199 | Uiso ? C |
| C99 | 1.0 | 0.094078  | 0.261274 | 0.200226 | Uiso ? C |

|      |     |           |          |          |          |
|------|-----|-----------|----------|----------|----------|
| C100 | 1.0 | 0.357717  | 0.429475 | 0.078195 | Uiso ? C |
| C101 | 1.0 | 0.192885  | 0.169040 | 0.207078 | Uiso ? C |
| C102 | 1.0 | 0.452817  | 0.334122 | 0.078019 | Uiso ? C |
| C103 | 1.0 | 0.239126  | 0.263126 | 0.204097 | Uiso ? C |
| C104 | 1.0 | 0.501365  | 0.430025 | 0.079655 | Uiso ? C |
| C105 | 1.0 | 0.339823  | 0.172175 | 0.212990 | Uiso ? C |
| C106 | 1.0 | 0.597782  | 0.335736 | 0.082025 | Uiso ? C |
| C107 | 1.0 | 0.383884  | 0.264566 | 0.206894 | Uiso ? C |
| C108 | 1.0 | 0.645932  | 0.431364 | 0.082775 | Uiso ? C |
| C109 | 1.0 | 0.479677  | 0.169232 | 0.207470 | Uiso ? C |
| C110 | 1.0 | 0.742090  | 0.336840 | 0.084413 | Uiso ? C |
| C111 | 1.0 | 0.525122  | 0.263046 | 0.204015 | Uiso ? C |
| C112 | 1.0 | 0.789995  | 0.432324 | 0.084698 | Uiso ? C |
| C113 | 1.0 | 0.618176  | 0.309028 | 0.200627 | Uiso ? C |
| C114 | 1.0 | -0.114899 | 0.479892 | 0.084277 | Uiso ? C |
| C115 | 1.0 | -0.335879 | 0.403041 | 0.197769 | Uiso ? C |
| C116 | 1.0 | -0.068113 | 0.574530 | 0.082623 | Uiso ? C |
| C117 | 1.0 | -0.239892 | 0.308356 | 0.199097 | Uiso ? C |
| C118 | 1.0 | 0.027030  | 0.479158 | 0.082591 | Uiso ? C |
| C119 | 1.0 | -0.192850 | 0.403179 | 0.198033 | Uiso ? C |
| C120 | 1.0 | 0.074009  | 0.573947 | 0.081377 | Uiso ? C |
| C121 | 1.0 | -0.097269 | 0.308197 | 0.198658 | Uiso ? C |
| C122 | 1.0 | 0.168600  | 0.478143 | 0.080432 | Uiso ? C |
| C123 | 1.0 | -0.049718 | 0.403380 | 0.198505 | Uiso ? C |
| C124 | 1.0 | 0.216047  | 0.573293 | 0.080054 | Uiso ? C |
| C125 | 1.0 | 0.045801  | 0.308350 | 0.199024 | Uiso ? C |

|      |     |           |          |          |          |
|------|-----|-----------|----------|----------|----------|
| C126 | 1.0 | 0.310522  | 0.477425 | 0.078863 | Uiso ? C |
| C127 | 1.0 | 0.093227  | 0.403462 | 0.198624 | Uiso ? C |
| C128 | 1.0 | 0.358324  | 0.572792 | 0.079082 | Uiso ? C |
| C129 | 1.0 | 0.189679  | 0.309171 | 0.200881 | Uiso ? C |
| C130 | 1.0 | 0.453422  | 0.477454 | 0.078985 | Uiso ? C |
| C131 | 1.0 | 0.236275  | 0.403609 | 0.198943 | Uiso ? C |
| C132 | 1.0 | 0.501172  | 0.572758 | 0.079139 | Uiso ? C |
| C133 | 1.0 | 0.334181  | 0.310586 | 0.203663 | Uiso ? C |
| C134 | 1.0 | 0.597492  | 0.478362 | 0.081215 | Uiso ? C |
| C135 | 1.0 | 0.379393  | 0.403790 | 0.199423 | Uiso ? C |
| C136 | 1.0 | 0.644890  | 0.573456 | 0.080647 | Uiso ? C |
| C137 | 1.0 | 0.477056  | 0.310429 | 0.203367 | Uiso ? C |
| C138 | 1.0 | 0.741881  | 0.479581 | 0.083838 | Uiso ? C |
| C139 | 1.0 | 0.521801  | 0.403417 | 0.198707 | Uiso ? C |
| C140 | 1.0 | 0.788872  | 0.574364 | 0.082470 | Uiso ? C |
| C141 | 1.0 | 0.615717  | 0.450045 | 0.196415 | Uiso ? C |
| C142 | 1.0 | -0.116291 | 0.621761 | 0.081635 | Uiso ? C |
| C143 | 1.0 | -0.338183 | 0.544141 | 0.193690 | Uiso ? C |
| C144 | 1.0 | -0.070436 | 0.715668 | 0.078461 | Uiso ? C |
| C145 | 1.0 | -0.241172 | 0.450276 | 0.196824 | Uiso ? C |
| C146 | 1.0 | 0.026111  | 0.621444 | 0.080828 | Uiso ? C |
| C147 | 1.0 | -0.194393 | 0.544888 | 0.195248 | Uiso ? C |
| C148 | 1.0 | 0.071662  | 0.715080 | 0.077231 | Uiso ? C |
| C149 | 1.0 | -0.097642 | 0.450790 | 0.197983 | Uiso ? C |
| C150 | 1.0 | 0.168379  | 0.620943 | 0.079943 | Uiso ? C |
| C151 | 1.0 | -0.050245 | 0.545879 | 0.197556 | Uiso ? C |

|      |     |           |          |          |          |
|------|-----|-----------|----------|----------|----------|
| C152 | 1.0 | 0.214768  | 0.715257 | 0.077695 | Uiso ? C |
| C153 | 1.0 | 0.045484  | 0.450990 | 0.198442 | Uiso ? C |
| C154 | 1.0 | 0.310757  | 0.620515 | 0.079220 | Uiso ? C |
| C155 | 1.0 | 0.093126  | 0.546230 | 0.198415 | Uiso ? C |
| C156 | 1.0 | 0.357946  | 0.715415 | 0.078408 | Uiso ? C |
| C157 | 1.0 | 0.188211  | 0.450915 | 0.198232 | Uiso ? C |
| C158 | 1.0 | 0.453374  | 0.620295 | 0.078832 | Uiso ? C |
| C159 | 1.0 | 0.235550  | 0.545927 | 0.197664 | Uiso ? C |
| C160 | 1.0 | 0.500917  | 0.715507 | 0.078603 | Uiso ? C |
| C161 | 1.0 | 0.330887  | 0.450779 | 0.197985 | Uiso ? C |
| C162 | 1.0 | 0.596624  | 0.620560 | 0.079421 | Uiso ? C |
| C163 | 1.0 | 0.377532  | 0.545280 | 0.196204 | Uiso ? C |
| C164 | 1.0 | 0.643932  | 0.715589 | 0.078768 | Uiso ? C |
| C165 | 1.0 | 0.473403  | 0.450479 | 0.197386 | Uiso ? C |
| C166 | 1.0 | 0.740337  | 0.621273 | 0.080883 | Uiso ? C |
| C167 | 1.0 | 0.519396  | 0.544485 | 0.194534 | Uiso ? C |
| C168 | 1.0 | 0.786980  | 0.715757 | 0.079045 | Uiso ? C |
| C169 | 1.0 | 0.613732  | 0.591465 | 0.192911 | Uiso ? C |
| C170 | 1.0 | -0.118704 | 0.762731 | 0.077431 | Uiso ? C |
| C171 | 1.0 | -0.339063 | 0.686439 | 0.192022 | Uiso ? C |
| C172 | 1.0 | -0.072849 | 0.856707 | 0.074439 | Uiso ? C |
| C173 | 1.0 | -0.243001 | 0.591741 | 0.193452 | Uiso ? C |
| C174 | 1.0 | 0.023100  | 0.762010 | 0.075521 | Uiso ? C |
| C175 | 1.0 | -0.195553 | 0.686878 | 0.192934 | Uiso ? C |
| C176 | 1.0 | 0.067249  | 0.854520 | 0.069879 | Uiso ? C |
| C177 | 1.0 | -0.098569 | 0.592959 | 0.196213 | Uiso ? C |

|      |     |           |          |          |           |
|------|-----|-----------|----------|----------|-----------|
| C178 | 1.0 | 0.165749  | 0.761885 | 0.075313 | Uiso ? C  |
| C179 | 1.0 | -0.050720 | 0.688385 | 0.196552 | Uiso ? C  |
| C180 | 1.0 | 0.210590  | 0.854738 | 0.070316 | Uiso ? C  |
| C181 | 1.0 | 0.045454  | 0.593851 | 0.198332 | Uiso ? C  |
| C182 | 1.0 | 0.309589  | 0.762488 | 0.077134 | Uiso ? C  |
| C183 | 1.0 | 0.093651  | 0.689457 | 0.199385 | Uiso ? C  |
| C184 | 1.0 | 0.356217  | 0.856972 | 0.075239 | Uiso ? C  |
| C185 | 1.0 | 0.188241  | 0.593788 | 0.198260 | Uiso ? C  |
| C186 | 1.0 | 0.453136  | 0.762988 | 0.078308 | Uiso ? C  |
| C187 | 1.0 | 0.236382  | 0.689371 | 0.199108 | Uiso ? C  |
| C188 | 1.0 | 0.500696  | 0.858212 | 0.078157 | Uiso ? C  |
| C189 | 1.0 | 0.330183  | 0.593131 | 0.196706 | Uiso ? C  |
| C190 | 1.0 | 0.596123  | 0.763117 | 0.078506 | Uiso ? C  |
| C191 | 1.0 | 0.377889  | 0.688435 | 0.196798 | Uiso ? C  |
| C192 | 1.0 | 0.643799  | 0.858373 | 0.078576 | Uiso ? C  |
| C193 | 1.0 | 0.471827  | 0.592230 | 0.194633 | Uiso ? C  |
| C194 | 1.0 | 0.738896  | 0.763053 | 0.078333 | Uiso ? C  |
| C195 | 1.0 | 0.519134  | 0.687263 | 0.194004 | Uiso ? C  |
| C196 | 1.0 | 0.786063  | 0.857987 | 0.077439 | Uiso ? C  |
| Eu1  | 1.0 | 0.250987  | 0.050530 | 0.138792 | Uiso ? Eu |

## 2. Eu-BG(AB).cif

#=====

# CRYSTAL DATA

#-----

data\_VESTA\_phase\_1

\_chemical\_name\_common 'POSCAR\_AB\_Eu'

\_cell\_length\_a 17.254942

\_cell\_length\_b 17.258297

\_cell\_length\_c 27.482088

\_cell\_angle\_alpha 95.020447

\_cell\_angle\_beta 93.945381

\_cell\_angle\_gamma 120.041382

\_cell\_volume 6996.903923

\_space\_group\_name\_H-M\_alt 'P 1'

\_space\_group\_IT\_number 1

loop\_

\_space\_group\_symop\_operation\_xyz

'x, y, z'

loop\_

\_atom\_site\_label

\_atom\_site\_occupancy

\_atom\_site\_fract\_x

\_atom\_site\_fract\_y

\_atom\_site\_fract\_z

\_atom\_site\_adp\_type

\_atom\_site\_U\_iso\_or\_equiv

\_atom\_site\_type\_symbol

|     |     |           |           |          |          |
|-----|-----|-----------|-----------|----------|----------|
| C1  | 1.0 | -0.140980 | 0.839438  | 0.216828 | Uiso ? C |
| C2  | 1.0 | 0.932428  | 0.935945  | 0.086161 | Uiso ? C |
| C3  | 1.0 | -0.093264 | -0.065171 | 0.217220 | Uiso ? C |
| C4  | 1.0 | 0.027060  | -0.016970 | 0.084015 | Uiso ? C |
| C5  | 1.0 | 0.001435  | 0.838985  | 0.214523 | Uiso ? C |
| C6  | 1.0 | 0.073961  | 0.934606  | 0.081186 | Uiso ? C |
| C7  | 1.0 | 0.049442  | -0.065390 | 0.216030 | Uiso ? C |
| C8  | 1.0 | 0.167982  | -0.018732 | 0.077239 | Uiso ? C |
| C9  | 1.0 | 0.144700  | 0.839445  | 0.215816 | Uiso ? C |
| C10 | 1.0 | 0.214423  | 0.932341  | 0.073075 | Uiso ? C |
| C11 | 1.0 | 0.193092  | -0.064392 | 0.220133 | Uiso ? C |
| C12 | 1.0 | 0.308414  | -0.021352 | 0.067802 | Uiso ? C |
| C13 | 1.0 | 0.288705  | -0.159522 | 0.221641 | Uiso ? C |
| C14 | 1.0 | 0.356725  | 0.930942  | 0.069749 | Uiso ? C |
| C15 | 1.0 | 0.337388  | -0.062970 | 0.229430 | Uiso ? C |
| C16 | 1.0 | 0.454373  | -0.019405 | 0.075231 | Uiso ? C |
| C17 | 1.0 | 0.432403  | -0.158839 | 0.224242 | Uiso ? C |
| C18 | 1.0 | 0.502692  | 0.934383  | 0.080783 | Uiso ? C |
| C19 | 1.0 | 0.481196  | -0.062477 | 0.229803 | Uiso ? C |
| C20 | 1.0 | 0.598922  | -0.016803 | 0.085833 | Uiso ? C |
| C21 | 1.0 | 0.574742  | -0.159274 | 0.222424 | Uiso ? C |

|     |     |           |           |          |          |
|-----|-----|-----------|-----------|----------|----------|
| C22 | 1.0 | 0.646907  | 0.936142  | 0.087674 | Uiso ? C |
| C23 | 1.0 | 0.622794  | -0.063488 | 0.224606 | Uiso ? C |
| C24 | 1.0 | 0.742594  | -0.015750 | 0.089278 | Uiso ? C |
| C25 | 1.0 | 0.716879  | 0.840120  | 0.219794 | Uiso ? C |
| C26 | 1.0 | 0.790125  | -0.063463 | 0.088624 | Uiso ? C |
| C27 | 1.0 | 0.764596  | -0.064433 | 0.220364 | Uiso ? C |
| C28 | 1.0 | 0.885187  | -0.016014 | 0.087892 | Uiso ? C |
| C29 | 1.0 | -0.140541 | -0.017150 | 0.218999 | Uiso ? C |
| C30 | 1.0 | 0.932885  | 0.079342  | 0.088431 | Uiso ? C |
| C31 | 1.0 | -0.092842 | 0.078210  | 0.219546 | Uiso ? C |
| C32 | 1.0 | 0.027738  | 0.126615  | 0.087039 | Uiso ? C |
| C33 | 1.0 | 0.001877  | -0.017595 | 0.216880 | Uiso ? C |
| C34 | 1.0 | 0.074695  | 0.078371  | 0.084536 | Uiso ? C |
| C35 | 1.0 | 0.049758  | 0.077944  | 0.218180 | Uiso ? C |
| C36 | 1.0 | 0.169536  | 0.125659  | 0.082801 | Uiso ? C |
| C37 | 1.0 | 0.145291  | -0.017049 | 0.218864 | Uiso ? C |
| C38 | 1.0 | 0.215893  | 0.077133  | 0.078591 | Uiso ? C |
| C39 | 1.0 | 0.193424  | 0.078983  | 0.221601 | Uiso ? C |
| C40 | 1.0 | 0.311140  | 0.124664  | 0.077634 | Uiso ? C |
| C41 | 1.0 | 0.289631  | -0.015309 | 0.227965 | Uiso ? C |
| C42 | 1.0 | 0.357347  | 0.076055  | 0.072145 | Uiso ? C |
| C43 | 1.0 | 0.337973  | 0.081589  | 0.232175 | Uiso ? C |
| C44 | 1.0 | 0.454948  | 0.125156  | 0.078014 | Uiso ? C |
| C45 | 1.0 | 0.434989  | -0.013868 | 0.235306 | Uiso ? C |
| C46 | 1.0 | 0.502709  | 0.077496  | 0.079461 | Uiso ? C |
| C47 | 1.0 | 0.483922  | 0.083538  | 0.239623 | Uiso ? C |

|     |     |           |           |          |          |
|-----|-----|-----------|-----------|----------|----------|
| C48 | 1.0 | 0.599247  | 0.126570  | 0.087297 | Uiso ? C |
| C49 | 1.0 | 0.576439  | -0.014959 | 0.228833 | Uiso ? C |
| C50 | 1.0 | 0.647050  | 0.079229  | 0.088575 | Uiso ? C |
| C51 | 1.0 | 0.624352  | 0.080906  | 0.230187 | Uiso ? C |
| C52 | 1.0 | 0.742901  | 0.127578  | 0.091419 | Uiso ? C |
| C53 | 1.0 | 0.717633  | -0.016193 | 0.222865 | Uiso ? C |
| C54 | 1.0 | 0.790471  | 0.079788  | 0.090574 | Uiso ? C |
| C55 | 1.0 | 0.765273  | 0.079151  | 0.223400 | Uiso ? C |
| C56 | 1.0 | 0.885610  | 0.127363  | 0.090221 | Uiso ? C |
| C57 | 1.0 | -0.140086 | 0.126248  | 0.221275 | Uiso ? C |
| C58 | 1.0 | 0.933332  | 0.222756  | 0.090621 | Uiso ? C |
| C59 | 1.0 | -0.092548 | 0.221437  | 0.220948 | Uiso ? C |
| C60 | 1.0 | 0.028208  | 0.270025  | 0.089131 | Uiso ? C |
| C61 | 1.0 | 0.002228  | 0.125660  | 0.218834 | Uiso ? C |
| C62 | 1.0 | 0.075468  | 0.222064  | 0.087621 | Uiso ? C |
| C63 | 1.0 | 0.049878  | 0.221020  | 0.219158 | Uiso ? C |
| C64 | 1.0 | 0.170486  | 0.269490  | 0.086786 | Uiso ? C |
| C65 | 1.0 | 0.145444  | 0.126044  | 0.219777 | Uiso ? C |
| C66 | 1.0 | 0.217598  | 0.221445  | 0.084982 | Uiso ? C |
| C67 | 1.0 | 0.193035  | 0.221416  | 0.220501 | Uiso ? C |
| C68 | 1.0 | 0.313004  | 0.269036  | 0.085506 | Uiso ? C |
| C69 | 1.0 | 0.289653  | 0.127795  | 0.226621 | Uiso ? C |
| C70 | 1.0 | 0.359943  | 0.221023  | 0.083176 | Uiso ? C |
| C71 | 1.0 | 0.337128  | 0.223029  | 0.226123 | Uiso ? C |
| C72 | 1.0 | 0.456203  | 0.269389  | 0.086345 | Uiso ? C |
| C73 | 1.0 | 0.435616  | 0.131243  | 0.237651 | Uiso ? C |

|     |     |           |          |          |          |
|-----|-----|-----------|----------|----------|----------|
| C74 | 1.0 | 0.503639  | 0.221708 | 0.085771 | Uiso ? C |
| C75 | 1.0 | 0.481874  | 0.224899 | 0.232545 | Uiso ? C |
| C76 | 1.0 | 0.599857  | 0.270329 | 0.091085 | Uiso ? C |
| C77 | 1.0 | 0.577913  | 0.129837 | 0.234354 | Uiso ? C |
| C78 | 1.0 | 0.647641  | 0.222732 | 0.091609 | Uiso ? C |
| C79 | 1.0 | 0.624584  | 0.224315 | 0.230891 | Uiso ? C |
| C80 | 1.0 | 0.743413  | 0.270970 | 0.093814 | Uiso ? C |
| C81 | 1.0 | 0.718374  | 0.127571 | 0.226239 | Uiso ? C |
| C82 | 1.0 | 0.790913  | 0.223202 | 0.092930 | Uiso ? C |
| C83 | 1.0 | 0.765735  | 0.222538 | 0.225116 | Uiso ? C |
| C84 | 1.0 | 0.886079  | 0.270740 | 0.092134 | Uiso ? C |
| C85 | 1.0 | -0.139855 | 0.269339 | 0.222045 | Uiso ? C |
| C86 | 1.0 | 0.933559  | 0.365847 | 0.091459 | Uiso ? C |
| C87 | 1.0 | -0.092749 | 0.364029 | 0.220089 | Uiso ? C |
| C88 | 1.0 | 0.028234  | 0.412945 | 0.089306 | Uiso ? C |
| C89 | 1.0 | 0.002319  | 0.268669 | 0.219480 | Uiso ? C |
| C90 | 1.0 | 0.075706  | 0.365149 | 0.088678 | Uiso ? C |
| C91 | 1.0 | 0.049683  | 0.363640 | 0.218475 | Uiso ? C |
| C92 | 1.0 | 0.170683  | 0.412492 | 0.087570 | Uiso ? C |
| C93 | 1.0 | 0.145183  | 0.268692 | 0.219371 | Uiso ? C |
| C94 | 1.0 | 0.218196  | 0.364812 | 0.087389 | Uiso ? C |
| C95 | 1.0 | 0.192642  | 0.363778 | 0.218984 | Uiso ? C |
| C96 | 1.0 | 0.313630  | 0.412473 | 0.087652 | Uiso ? C |
| C97 | 1.0 | 0.288845  | 0.269489 | 0.222549 | Uiso ? C |
| C98 | 1.0 | 0.361178  | 0.364894 | 0.087724 | Uiso ? C |
| C99 | 1.0 | 0.336234  | 0.364520 | 0.221573 | Uiso ? C |

|      |     |           |          |          |          |
|------|-----|-----------|----------|----------|----------|
| C100 | 1.0 | 0.456836  | 0.412880 | 0.089202 | Uiso ? C |
| C101 | 1.0 | 0.433132  | 0.271238 | 0.228049 | Uiso ? C |
| C102 | 1.0 | 0.504542  | 0.365279 | 0.089797 | Uiso ? C |
| C103 | 1.0 | 0.479979  | 0.365357 | 0.224944 | Uiso ? C |
| C104 | 1.0 | 0.600331  | 0.413530 | 0.092036 | Uiso ? C |
| C105 | 1.0 | 0.576835  | 0.272057 | 0.230417 | Uiso ? C |
| C106 | 1.0 | 0.648102  | 0.366122 | 0.093260 | Uiso ? C |
| C107 | 1.0 | 0.623170  | 0.365810 | 0.226012 | Uiso ? C |
| C108 | 1.0 | 0.743679  | 0.414055 | 0.093863 | Uiso ? C |
| C109 | 1.0 | 0.718486  | 0.270544 | 0.226431 | Uiso ? C |
| C110 | 1.0 | 0.791274  | 0.366455 | 0.093971 | Uiso ? C |
| C111 | 1.0 | 0.765267  | 0.364950 | 0.223282 | Uiso ? C |
| C112 | 1.0 | 0.886119  | 0.413691 | 0.092237 | Uiso ? C |
| C113 | 1.0 | -0.140349 | 0.411696 | 0.220168 | Uiso ? C |
| C114 | 1.0 | 0.933288  | 0.508375 | 0.090035 | Uiso ? C |
| C115 | 1.0 | -0.093386 | 0.506138 | 0.217365 | Uiso ? C |
| C116 | 1.0 | 0.027797  | 0.555275 | 0.087302 | Uiso ? C |
| C117 | 1.0 | 0.001954  | 0.411144 | 0.218078 | Uiso ? C |
| C118 | 1.0 | 0.075401  | 0.507617 | 0.087404 | Uiso ? C |
| C119 | 1.0 | 0.049145  | 0.505840 | 0.216056 | Uiso ? C |
| C120 | 1.0 | 0.170226  | 0.554758 | 0.085651 | Uiso ? C |
| C121 | 1.0 | 0.144818  | 0.411121 | 0.217972 | Uiso ? C |
| C122 | 1.0 | 0.218005  | 0.507395 | 0.086529 | Uiso ? C |
| C123 | 1.0 | 0.192219  | 0.506117 | 0.217006 | Uiso ? C |
| C124 | 1.0 | 0.313340  | 0.555037 | 0.086371 | Uiso ? C |
| C125 | 1.0 | 0.288176  | 0.411596 | 0.219699 | Uiso ? C |

|      |     |           |          |          |          |
|------|-----|-----------|----------|----------|----------|
| C126 | 1.0 | 0.361253  | 0.507735 | 0.087600 | Uiso ? C |
| C127 | 1.0 | 0.335640  | 0.506645 | 0.219085 | Uiso ? C |
| C128 | 1.0 | 0.456699  | 0.555535 | 0.088350 | Uiso ? C |
| C129 | 1.0 | 0.431715  | 0.412332 | 0.222422 | Uiso ? C |
| C130 | 1.0 | 0.504592  | 0.508171 | 0.089631 | Uiso ? C |
| C131 | 1.0 | 0.479001  | 0.507145 | 0.221061 | Uiso ? C |
| C132 | 1.0 | 0.600122  | 0.556064 | 0.090418 | Uiso ? C |
| C133 | 1.0 | 0.575215  | 0.412998 | 0.224385 | Uiso ? C |
| C134 | 1.0 | 0.648004  | 0.508806 | 0.091717 | Uiso ? C |
| C135 | 1.0 | 0.622110  | 0.507424 | 0.221764 | Uiso ? C |
| C136 | 1.0 | 0.743191  | 0.556331 | 0.091342 | Uiso ? C |
| C137 | 1.0 | 0.717731  | 0.412584 | 0.223198 | Uiso ? C |
| C138 | 1.0 | 0.790981  | 0.508882 | 0.092159 | Uiso ? C |
| C139 | 1.0 | 0.764533  | 0.506895 | 0.220096 | Uiso ? C |
| C140 | 1.0 | 0.885715  | 0.556031 | 0.090025 | Uiso ? C |
| C141 | 1.0 | -0.140956 | 0.553798 | 0.217370 | Uiso ? C |
| C142 | 1.0 | 0.932680  | 0.650471 | 0.087220 | Uiso ? C |
| C143 | 1.0 | -0.093777 | 0.648490 | 0.215191 | Uiso ? C |
| C144 | 1.0 | 0.027064  | 0.697216 | 0.084110 | Uiso ? C |
| C145 | 1.0 | 0.001351  | 0.553286 | 0.215234 | Uiso ? C |
| C146 | 1.0 | 0.074602  | 0.649582 | 0.084189 | Uiso ? C |
| C147 | 1.0 | 0.048658  | 0.648116 | 0.213534 | Uiso ? C |
| C148 | 1.0 | 0.169166  | 0.696361 | 0.081375 | Uiso ? C |
| C149 | 1.0 | 0.144336  | 0.553371 | 0.215689 | Uiso ? C |
| C150 | 1.0 | 0.217121  | 0.649176 | 0.083010 | Uiso ? C |
| C151 | 1.0 | 0.192010  | 0.648644 | 0.215353 | Uiso ? C |

|      |     |           |          |          |          |
|------|-----|-----------|----------|----------|----------|
| C152 | 1.0 | 0.312358  | 0.696818 | 0.082453 | Uiso ? C |
| C153 | 1.0 | 0.287749  | 0.554012 | 0.217798 | Uiso ? C |
| C154 | 1.0 | 0.360622  | 0.649846 | 0.084994 | Uiso ? C |
| C155 | 1.0 | 0.335510  | 0.649299 | 0.218214 | Uiso ? C |
| C156 | 1.0 | 0.456106  | 0.697659 | 0.085848 | Uiso ? C |
| C157 | 1.0 | 0.431088  | 0.554447 | 0.219840 | Uiso ? C |
| C158 | 1.0 | 0.504164  | 0.650584 | 0.087738 | Uiso ? C |
| C159 | 1.0 | 0.478722  | 0.649711 | 0.219787 | Uiso ? C |
| C160 | 1.0 | 0.599703  | 0.698408 | 0.088468 | Uiso ? C |
| C161 | 1.0 | 0.574337  | 0.554790 | 0.220907 | Uiso ? C |
| C162 | 1.0 | 0.647529  | 0.651068 | 0.089476 | Uiso ? C |
| C163 | 1.0 | 0.621674  | 0.649695 | 0.219878 | Uiso ? C |
| C164 | 1.0 | 0.742665  | 0.698551 | 0.088968 | Uiso ? C |
| C165 | 1.0 | 0.716937  | 0.554565 | 0.220017 | Uiso ? C |
| C166 | 1.0 | 0.790388  | 0.651035 | 0.089339 | Uiso ? C |
| C167 | 1.0 | 0.764117  | 0.649246 | 0.218140 | Uiso ? C |
| C168 | 1.0 | 0.885088  | 0.698144 | 0.087314 | Uiso ? C |
| C169 | 1.0 | -0.141207 | 0.696347 | 0.215999 | Uiso ? C |
| C170 | 1.0 | 0.932199  | 0.792842 | 0.085380 | Uiso ? C |
| C171 | 1.0 | -0.093729 | 0.791453 | 0.215322 | Uiso ? C |
| C172 | 1.0 | 0.026605  | 0.839637 | 0.082299 | Uiso ? C |
| C173 | 1.0 | 0.001067  | 0.695720 | 0.213454 | Uiso ? C |
| C174 | 1.0 | 0.073850  | 0.791625 | 0.080975 | Uiso ? C |
| C175 | 1.0 | 0.048927  | 0.791206 | 0.213614 | Uiso ? C |
| C176 | 1.0 | 0.167752  | 0.837854 | 0.076516 | Uiso ? C |
| C177 | 1.0 | 0.144239  | 0.696056 | 0.214134 | Uiso ? C |

|      |     |          |          |          |           |
|------|-----|----------|----------|----------|-----------|
| C178 | 1.0 | 0.215511 | 0.790120 | 0.076984 | Uiso ? C  |
| C179 | 1.0 | 0.192486 | 0.791852 | 0.216321 | Uiso ? C  |
| C180 | 1.0 | 0.310474 | 0.837281 | 0.074850 | Uiso ? C  |
| C181 | 1.0 | 0.287804 | 0.696899 | 0.217607 | Uiso ? C  |
| C182 | 1.0 | 0.359214 | 0.790935 | 0.079344 | Uiso ? C  |
| C183 | 1.0 | 0.336143 | 0.792793 | 0.221068 | Uiso ? C  |
| C184 | 1.0 | 0.455219 | 0.839145 | 0.081275 | Uiso ? C  |
| C185 | 1.0 | 0.431171 | 0.697289 | 0.219704 | Uiso ? C  |
| C186 | 1.0 | 0.503503 | 0.792691 | 0.084873 | Uiso ? C  |
| C187 | 1.0 | 0.479341 | 0.793145 | 0.221912 | Uiso ? C  |
| C188 | 1.0 | 0.599318 | 0.840769 | 0.086947 | Uiso ? C  |
| C189 | 1.0 | 0.574159 | 0.697369 | 0.220052 | Uiso ? C  |
| C190 | 1.0 | 0.647172 | 0.793497 | 0.088092 | Uiso ? C  |
| C191 | 1.0 | 0.621861 | 0.792686 | 0.220630 | Uiso ? C  |
| C192 | 1.0 | 0.742479 | 0.841178 | 0.088309 | Uiso ? C  |
| C193 | 1.0 | 0.716650 | 0.697044 | 0.218770 | Uiso ? C  |
| C194 | 1.0 | 0.790039 | 0.793530 | 0.087982 | Uiso ? C  |
| C195 | 1.0 | 0.764144 | 0.792165 | 0.218304 | Uiso ? C  |
| C196 | 1.0 | 0.884899 | 0.840756 | 0.086492 | Uiso ? C  |
| Eu1  | 1.0 | 0.396143 | 0.030984 | 0.153715 | Uiso ? Eu |

### 3. Eu-NPBG(AA).cif

```
#=====
# CRYSTAL DATA
#-----

data_VESTA_phase_1

_chemical_name_common      'AA-bigraph-Pt      '
_cell_length_a             14.740000
_cell_length_b             14.740000
_cell_length_c             30.000000
_cell_angle_alpha          90.000000
_cell_angle_beta           90.000000
_cell_angle_gamma          120.000000
_cell_volume               5644.777655
_space_group_name_H-M_alt   'P 1'
_space_group_IT_number      1

loop_

_space_group_symop_operation_xyz

  'x, y, z'

loop_

_atom_site_label
_atom_site_occupancy
_atom_site_fract_x
```

\_atom\_site\_fract\_y

\_atom\_site\_fract\_z

\_atom\_site\_adp\_type

\_atom\_site\_U\_iso\_or\_equiv

\_atom\_site\_type\_symbol

|     |     |           |           |          |          |
|-----|-----|-----------|-----------|----------|----------|
| C1  | 1.0 | 0.000053  | 0.000483  | 0.325966 | Uiso ? C |
| C2  | 1.0 | 0.165613  | 0.000244  | 0.331930 | Uiso ? C |
| C3  | 1.0 | 0.333361  | 0.000208  | 0.331694 | Uiso ? C |
| C4  | 1.0 | 0.499315  | 0.000462  | 0.325603 | Uiso ? C |
| C5  | 1.0 | 0.665635  | -0.000394 | 0.323642 | Uiso ? C |
| C6  | 1.0 | 0.832971  | -0.000312 | 0.323781 | Uiso ? C |
| C7  | 1.0 | -0.000118 | 0.166721  | 0.329175 | Uiso ? C |
| C8  | 1.0 | 0.163382  | 0.162816  | 0.346013 | Uiso ? C |
| C9  | 1.0 | 0.319280  | 0.139505  | 0.368870 | Uiso ? C |
| C10 | 1.0 | 0.498211  | 0.162567  | 0.345892 | Uiso ? C |
| C11 | 1.0 | 0.665914  | 0.166570  | 0.329434 | Uiso ? C |
| C12 | 1.0 | 0.832970  | 0.166846  | 0.323804 | Uiso ? C |
| C13 | 1.0 | 0.000051  | 0.333131  | 0.325970 | Uiso ? C |
| C14 | 1.0 | 0.163399  | 0.334151  | 0.345990 | Uiso ? C |
| C15 | 1.0 | 0.670194  | 0.333960  | 0.346166 | Uiso ? C |
| C16 | 1.0 | 0.832173  | 0.333097  | 0.326281 | Uiso ? C |
| C17 | 1.0 | -0.000975 | 0.499885  | 0.324413 | Uiso ? C |
| C18 | 1.0 | 0.165617  | 0.498938  | 0.331897 | Uiso ? C |
| C19 | 1.0 | 0.319293  | 0.513382  | 0.368836 | Uiso ? C |
| C20 | 1.0 | 0.680540  | 0.507061  | 0.366640 | Uiso ? C |
| C21 | 1.0 | 0.831178  | 0.498678  | 0.332517 | Uiso ? C |

|     |     |           |           |          |          |
|-----|-----|-----------|-----------|----------|----------|
| C22 | 1.0 | 0.997941  | 0.665751  | 0.325406 | Uiso ? C |
| C23 | 1.0 | 0.166160  | 0.665900  | 0.324901 | Uiso ? C |
| C24 | 1.0 | 0.333358  | 0.666740  | 0.331649 | Uiso ? C |
| C25 | 1.0 | 0.498207  | 0.669238  | 0.345831 | Uiso ? C |
| C26 | 1.0 | 0.670178  | 0.669801  | 0.346124 | Uiso ? C |
| C27 | 1.0 | 0.831170  | 0.666051  | 0.332505 | Uiso ? C |
| C28 | 1.0 | -0.000973 | 0.832703  | 0.324421 | Uiso ? C |
| C29 | 1.0 | 0.166162  | 0.833836  | 0.324932 | Uiso ? C |
| C30 | 1.0 | 0.332343  | 0.832970  | 0.323635 | Uiso ? C |
| C31 | 1.0 | 0.499312  | 0.832452  | 0.325569 | Uiso ? C |
| C32 | 1.0 | 0.665911  | 0.832911  | 0.329368 | Uiso ? C |
| C33 | 1.0 | 0.832169  | 0.832632  | 0.326236 | Uiso ? C |
| C34 | 1.0 | 0.000266  | 0.000650  | 0.458050 | Uiso ? C |
| C35 | 1.0 | 0.165846  | 0.000426  | 0.452204 | Uiso ? C |
| C36 | 1.0 | 0.333597  | 0.000389  | 0.452359 | Uiso ? C |
| C37 | 1.0 | 0.499565  | 0.000635  | 0.458255 | Uiso ? C |
| C38 | 1.0 | 0.665877  | -0.000214 | 0.460095 | Uiso ? C |
| C39 | 1.0 | 0.833194  | -0.000141 | 0.460031 | Uiso ? C |
| C40 | 1.0 | 0.000115  | 0.166899  | 0.454830 | Uiso ? C |
| C41 | 1.0 | 0.163648  | 0.163008  | 0.438120 | Uiso ? C |
| C42 | 1.0 | 0.319422  | 0.139642  | 0.415210 | Uiso ? C |
| C43 | 1.0 | 0.498406  | 0.162743  | 0.438075 | Uiso ? C |
| C44 | 1.0 | 0.666151  | 0.166747  | 0.454394 | Uiso ? C |
| C45 | 1.0 | 0.833199  | 0.167024  | 0.460056 | Uiso ? C |
| C46 | 1.0 | 0.000280  | 0.333312  | 0.458071 | Uiso ? C |
| C47 | 1.0 | 0.163650  | 0.334330  | 0.438105 | Uiso ? C |

|     |     |           |          |          |          |
|-----|-----|-----------|----------|----------|----------|
| C48 | 1.0 | 0.670433  | 0.334134 | 0.437685 | Uiso ? C |
| C49 | 1.0 | 0.832393  | 0.333277 | 0.457660 | Uiso ? C |
| C50 | 1.0 | -0.000746 | 0.500066 | 0.459636 | Uiso ? C |
| C51 | 1.0 | 0.165857  | 0.499120 | 0.452189 | Uiso ? C |
| C52 | 1.0 | 0.319413  | 0.513468 | 0.415173 | Uiso ? C |
| C53 | 1.0 | 0.680926  | 0.507286 | 0.417244 | Uiso ? C |
| C54 | 1.0 | 0.831416  | 0.498861 | 0.451454 | Uiso ? C |
| C55 | 1.0 | 0.998168  | 0.665928 | 0.458647 | Uiso ? C |
| C56 | 1.0 | 0.166406  | 0.666081 | 0.459160 | Uiso ? C |
| C57 | 1.0 | 0.333598  | 0.666912 | 0.452321 | Uiso ? C |
| C58 | 1.0 | 0.498409  | 0.669380 | 0.438022 | Uiso ? C |
| C59 | 1.0 | 0.670416  | 0.669977 | 0.437653 | Uiso ? C |
| C60 | 1.0 | 0.831402  | 0.666228 | 0.451434 | Uiso ? C |
| C61 | 1.0 | -0.000757 | 0.832871 | 0.459616 | Uiso ? C |
| C62 | 1.0 | 0.166402  | 0.834017 | 0.459160 | Uiso ? C |
| C63 | 1.0 | 0.332600  | 0.833153 | 0.460341 | Uiso ? C |
| C64 | 1.0 | 0.499564  | 0.832640 | 0.458233 | Uiso ? C |
| C65 | 1.0 | 0.666147  | 0.833097 | 0.454367 | Uiso ? C |
| C66 | 1.0 | 0.832382  | 0.832802 | 0.457625 | Uiso ? C |
| C67 | 1.0 | 0.055601  | 0.110703 | 0.331703 | Uiso ? C |
| C68 | 1.0 | 0.217830  | 0.108202 | 0.346034 | Uiso ? C |
| C69 | 1.0 | 0.389113  | 0.107928 | 0.345955 | Uiso ? C |
| C70 | 1.0 | 0.554105  | 0.110638 | 0.331597 | Uiso ? C |
| C71 | 1.0 | 0.721185  | 0.111358 | 0.324503 | Uiso ? C |
| C72 | 1.0 | 0.889266  | 0.111412 | 0.324439 | Uiso ? C |
| C73 | 1.0 | 0.055605  | 0.278461 | 0.331694 | Uiso ? C |

|     |     |          |          |          |          |
|-----|-----|----------|----------|----------|----------|
| C74 | 1.0 | 0.194750 | 0.264175 | 0.368908 | Uiso ? C |
| C75 | 1.0 | 0.568186 | 0.263988 | 0.368655 | Uiso ? C |
| C76 | 1.0 | 0.722096 | 0.278347 | 0.332307 | Uiso ? C |
| C77 | 1.0 | 0.888204 | 0.277439 | 0.323904 | Uiso ? C |
| C78 | 1.0 | 0.055387 | 0.444276 | 0.326168 | Uiso ? C |
| C79 | 1.0 | 0.217844 | 0.443210 | 0.346003 | Uiso ? C |
| C80 | 1.0 | 0.723042 | 0.443414 | 0.346426 | Uiso ? C |
| C81 | 1.0 | 0.887162 | 0.444239 | 0.326590 | Uiso ? C |
| C82 | 1.0 | 0.054319 | 0.610408 | 0.324528 | Uiso ? C |
| C83 | 1.0 | 0.221546 | 0.610682 | 0.329434 | Uiso ? C |
| C84 | 1.0 | 0.389118 | 0.614775 | 0.345905 | Uiso ? C |
| C85 | 1.0 | 0.568189 | 0.637834 | 0.368616 | Uiso ? C |
| C86 | 1.0 | 0.723022 | 0.613187 | 0.346406 | Uiso ? C |
| C87 | 1.0 | 0.887194 | 0.610374 | 0.330108 | Uiso ? C |
| C88 | 1.0 | 0.054321 | 0.777474 | 0.324549 | Uiso ? C |
| C89 | 1.0 | 0.221713 | 0.777646 | 0.324041 | Uiso ? C |
| C90 | 1.0 | 0.388086 | 0.776863 | 0.325622 | Uiso ? C |
| C91 | 1.0 | 0.554103 | 0.777058 | 0.331532 | Uiso ? C |
| C92 | 1.0 | 0.722086 | 0.777304 | 0.332243 | Uiso ? C |
| C93 | 1.0 | 0.887157 | 0.776477 | 0.326574 | Uiso ? C |
| C94 | 1.0 | 0.055389 | 0.944676 | 0.326180 | Uiso ? C |
| C95 | 1.0 | 0.221549 | 0.944439 | 0.329478 | Uiso ? C |
| C96 | 1.0 | 0.388091 | 0.944821 | 0.325649 | Uiso ? C |
| C97 | 1.0 | 0.555040 | 0.944321 | 0.323511 | Uiso ? C |
| C98 | 1.0 | 0.721188 | 0.943399 | 0.324466 | Uiso ? C |
| C99 | 1.0 | 0.888208 | 0.944327 | 0.323873 | Uiso ? C |

|      |     |          |          |          |          |
|------|-----|----------|----------|----------|----------|
| C100 | 1.0 | 0.055832 | 0.110879 | 0.452362 | Uiso ? C |
| C101 | 1.0 | 0.218066 | 0.108390 | 0.438113 | Uiso ? C |
| C102 | 1.0 | 0.389323 | 0.108108 | 0.438086 | Uiso ? C |
| C103 | 1.0 | 0.554348 | 0.110807 | 0.452279 | Uiso ? C |
| C104 | 1.0 | 0.721426 | 0.111538 | 0.459287 | Uiso ? C |
| C105 | 1.0 | 0.889479 | 0.111582 | 0.459444 | Uiso ? C |
| C106 | 1.0 | 0.055839 | 0.278644 | 0.452367 | Uiso ? C |
| C107 | 1.0 | 0.194965 | 0.264319 | 0.415182 | Uiso ? C |
| C108 | 1.0 | 0.568302 | 0.264118 | 0.415256 | Uiso ? C |
| C109 | 1.0 | 0.722324 | 0.278537 | 0.451558 | Uiso ? C |
| C110 | 1.0 | 0.888425 | 0.277622 | 0.460050 | Uiso ? C |
| C111 | 1.0 | 0.055620 | 0.444458 | 0.457900 | Uiso ? C |
| C112 | 1.0 | 0.218071 | 0.443374 | 0.438085 | Uiso ? C |
| C113 | 1.0 | 0.723327 | 0.443617 | 0.437463 | Uiso ? C |
| C114 | 1.0 | 0.887387 | 0.444417 | 0.457404 | Uiso ? C |
| C115 | 1.0 | 0.054556 | 0.610592 | 0.459539 | Uiso ? C |
| C116 | 1.0 | 0.221793 | 0.610862 | 0.454616 | Uiso ? C |
| C117 | 1.0 | 0.389322 | 0.614922 | 0.438034 | Uiso ? C |
| C118 | 1.0 | 0.568315 | 0.637907 | 0.415209 | Uiso ? C |
| C119 | 1.0 | 0.723304 | 0.613374 | 0.437441 | Uiso ? C |
| C120 | 1.0 | 0.887421 | 0.610553 | 0.453896 | Uiso ? C |
| C121 | 1.0 | 0.054551 | 0.777653 | 0.459526 | Uiso ? C |
| C122 | 1.0 | 0.221962 | 0.777830 | 0.460013 | Uiso ? C |
| C123 | 1.0 | 0.388342 | 0.777051 | 0.458285 | Uiso ? C |
| C124 | 1.0 | 0.554343 | 0.777248 | 0.452243 | Uiso ? C |
| C125 | 1.0 | 0.722312 | 0.777471 | 0.451528 | Uiso ? C |

|      |     |          |          |          |           |
|------|-----|----------|----------|----------|-----------|
| C126 | 1.0 | 0.887377 | 0.776652 | 0.457375 | Uiso ? C  |
| C127 | 1.0 | 0.055605 | 0.944846 | 0.457893 | Uiso ? C  |
| C128 | 1.0 | 0.221791 | 0.944627 | 0.454630 | Uiso ? C  |
| C129 | 1.0 | 0.388342 | 0.944997 | 0.458311 | Uiso ? C  |
| C130 | 1.0 | 0.555292 | 0.944501 | 0.460260 | Uiso ? C  |
| C131 | 1.0 | 0.721423 | 0.943579 | 0.459268 | Uiso ? C  |
| C132 | 1.0 | 0.888413 | 0.944487 | 0.460013 | Uiso ? C  |
| Eu1  | 1.0 | 0.481597 | 0.407457 | 0.392098 | Uiso ? Eu |

#### 4. Eu-NPBG(AB).cif

```
#=====
# CRYSTAL DATA
#-----

data_VESTA_phase_1

_chemical_name_common      'AB_bigraph      '
_cell_length_a             14.718637
_cell_length_b             14.716187
_cell_length_c             22.178364
_cell_angle_alpha          90.382126
_cell_angle_beta           90.062698
_cell_angle_gamma          119.991257
_cell_volume               4160.504036
_space_group_name_H-M_alt   'P 1'
_space_group_IT_number      1

loop_

_space_group_symop_operation_xyz

  'x, y, z'

loop_

_atom_site_label
_atom_site_occupancy
_atom_site_fract_x
```

\_atom\_site\_fract\_y

\_atom\_site\_fract\_z

\_atom\_site\_adp\_type

\_atom\_site\_U\_iso\_or\_equiv

\_atom\_site\_type\_symbol

|     |     |          |          |          |          |
|-----|-----|----------|----------|----------|----------|
| C1  | 1.0 | 0.999842 | 0.999587 | 0.296380 | Uiso ? C |
| C2  | 1.0 | 0.167094 | 0.000322 | 0.291922 | Uiso ? C |
| C3  | 1.0 | 0.334407 | 0.000323 | 0.291897 | Uiso ? C |
| C4  | 1.0 | 0.500940 | 0.999589 | 0.296320 | Uiso ? C |
| C5  | 1.0 | 0.667137 | 0.999086 | 0.305050 | Uiso ? C |
| C6  | 1.0 | 0.833172 | 0.999087 | 0.305087 | Uiso ? C |
| C7  | 1.0 | 0.000527 | 0.166439 | 0.305269 | Uiso ? C |
| C8  | 1.0 | 0.167406 | 0.167232 | 0.306843 | Uiso ? C |
| C9  | 1.0 | 0.333823 | 0.166438 | 0.306357 | Uiso ? C |
| C10 | 1.0 | 0.501045 | 0.167257 | 0.306787 | Uiso ? C |
| C11 | 1.0 | 0.667125 | 0.166453 | 0.305185 | Uiso ? C |
| C12 | 1.0 | 0.833599 | 0.165992 | 0.305346 | Uiso ? C |
| C13 | 1.0 | 0.000513 | 0.332459 | 0.305284 | Uiso ? C |
| C14 | 1.0 | 0.167187 | 0.332981 | 0.323248 | Uiso ? C |
| C15 | 1.0 | 0.320301 | 0.308981 | 0.357606 | Uiso ? C |
| C16 | 1.0 | 0.490034 | 0.308965 | 0.357605 | Uiso ? C |
| C17 | 1.0 | 0.667054 | 0.333004 | 0.323202 | Uiso ? C |
| C18 | 1.0 | 0.833153 | 0.332464 | 0.305238 | Uiso ? C |
| C19 | 1.0 | 0.999815 | 0.498437 | 0.296406 | Uiso ? C |
| C20 | 1.0 | 0.167403 | 0.498581 | 0.306740 | Uiso ? C |
| C21 | 1.0 | 0.320368 | 0.510890 | 0.357486 | Uiso ? C |

|     |     |          |          |          |          |
|-----|-----|----------|----------|----------|----------|
| C22 | 1.0 | 0.691985 | 0.510945 | 0.357485 | Uiso ? C |
| C23 | 1.0 | 0.832401 | 0.498591 | 0.306703 | Uiso ? C |
| C24 | 1.0 | 0.998972 | 0.664865 | 0.291804 | Uiso ? C |
| C25 | 1.0 | 0.167082 | 0.664860 | 0.291818 | Uiso ? C |
| C26 | 1.0 | 0.333849 | 0.665780 | 0.306122 | Uiso ? C |
| C27 | 1.0 | 0.490093 | 0.680615 | 0.357410 | Uiso ? C |
| C28 | 1.0 | 0.691969 | 0.680652 | 0.357409 | Uiso ? C |
| C29 | 1.0 | 0.833196 | 0.665810 | 0.306109 | Uiso ? C |
| C30 | 1.0 | 0.998987 | 0.832211 | 0.291791 | Uiso ? C |
| C31 | 1.0 | 0.166784 | 0.832392 | 0.287274 | Uiso ? C |
| C32 | 1.0 | 0.334408 | 0.832198 | 0.291781 | Uiso ? C |
| C33 | 1.0 | 0.501060 | 0.832225 | 0.306539 | Uiso ? C |
| C34 | 1.0 | 0.667059 | 0.832835 | 0.322948 | Uiso ? C |
| C35 | 1.0 | 0.832415 | 0.832243 | 0.306556 | Uiso ? C |
| C36 | 1.0 | 0.002429 | 0.001975 | 0.484674 | Uiso ? C |
| C37 | 1.0 | 0.169107 | 0.002478 | 0.475968 | Uiso ? C |
| C38 | 1.0 | 0.335148 | 0.002484 | 0.475989 | Uiso ? C |
| C39 | 1.0 | 0.501340 | 0.001982 | 0.484728 | Uiso ? C |
| C40 | 1.0 | 0.667871 | 0.001244 | 0.489153 | Uiso ? C |
| C41 | 1.0 | 0.835178 | 0.001242 | 0.489119 | Uiso ? C |
| C42 | 1.0 | 0.003264 | 0.169343 | 0.489192 | Uiso ? C |
| C43 | 1.0 | 0.169845 | 0.169312 | 0.474492 | Uiso ? C |
| C44 | 1.0 | 0.335213 | 0.168737 | 0.458139 | Uiso ? C |
| C45 | 1.0 | 0.501214 | 0.169351 | 0.474545 | Uiso ? C |
| C46 | 1.0 | 0.667864 | 0.169371 | 0.489268 | Uiso ? C |
| C47 | 1.0 | 0.835481 | 0.169169 | 0.493712 | Uiso ? C |

|     |     |          |          |          |          |
|-----|-----|----------|----------|----------|----------|
| C48 | 1.0 | 0.003274 | 0.336682 | 0.489179 | Uiso ? C |
| C49 | 1.0 | 0.169059 | 0.335744 | 0.474931 | Uiso ? C |
| C50 | 1.0 | 0.310338 | 0.320934 | 0.423686 | Uiso ? C |
| C51 | 1.0 | 0.512164 | 0.320970 | 0.423699 | Uiso ? C |
| C52 | 1.0 | 0.668416 | 0.335800 | 0.474977 | Uiso ? C |
| C53 | 1.0 | 0.835182 | 0.336704 | 0.489222 | Uiso ? C |
| C54 | 1.0 | 0.002451 | 0.503124 | 0.484651 | Uiso ? C |
| C55 | 1.0 | 0.169856 | 0.502965 | 0.474348 | Uiso ? C |
| C56 | 1.0 | 0.310322 | 0.490636 | 0.423611 | Uiso ? C |
| C57 | 1.0 | 0.681903 | 0.490688 | 0.423611 | Uiso ? C |
| C58 | 1.0 | 0.834866 | 0.502995 | 0.474366 | Uiso ? C |
| C59 | 1.0 | 0.001770 | 0.669112 | 0.475818 | Uiso ? C |
| C60 | 1.0 | 0.169123 | 0.669098 | 0.475825 | Uiso ? C |
| C61 | 1.0 | 0.335219 | 0.668557 | 0.457889 | Uiso ? C |
| C62 | 1.0 | 0.512226 | 0.692573 | 0.423503 | Uiso ? C |
| C63 | 1.0 | 0.681972 | 0.692576 | 0.423491 | Uiso ? C |
| C64 | 1.0 | 0.835086 | 0.668588 | 0.457866 | Uiso ? C |
| C65 | 1.0 | 0.001757 | 0.835129 | 0.475830 | Uiso ? C |
| C66 | 1.0 | 0.168687 | 0.835577 | 0.475708 | Uiso ? C |
| C67 | 1.0 | 0.335159 | 0.835118 | 0.475859 | Uiso ? C |
| C68 | 1.0 | 0.501234 | 0.834306 | 0.474299 | Uiso ? C |
| C69 | 1.0 | 0.668450 | 0.835113 | 0.474741 | Uiso ? C |
| C70 | 1.0 | 0.834867 | 0.834326 | 0.474261 | Uiso ? C |
| C71 | 1.0 | 0.055939 | 0.111107 | 0.301235 | Uiso ? C |
| C72 | 1.0 | 0.222888 | 0.111392 | 0.300083 | Uiso ? C |
| C73 | 1.0 | 0.389705 | 0.111401 | 0.300052 | Uiso ? C |

|     |     |          |          |          |          |
|-----|-----|----------|----------|----------|----------|
| C74 | 1.0 | 0.556376 | 0.111121 | 0.301155 | Uiso ? C |
| C75 | 1.0 | 0.722623 | 0.110507 | 0.304373 | Uiso ? C |
| C76 | 1.0 | 0.889100 | 0.110502 | 0.304424 | Uiso ? C |
| C77 | 1.0 | 0.056967 | 0.277723 | 0.310073 | Uiso ? C |
| C78 | 1.0 | 0.220423 | 0.273974 | 0.326748 | Uiso ? C |
| C79 | 1.0 | 0.383480 | 0.265657 | 0.337519 | Uiso ? C |
| C80 | 1.0 | 0.554822 | 0.273993 | 0.326721 | Uiso ? C |
| C81 | 1.0 | 0.721976 | 0.277738 | 0.310002 | Uiso ? C |
| C82 | 1.0 | 0.889082 | 0.276955 | 0.304492 | Uiso ? C |
| C83 | 1.0 | 0.055918 | 0.443115 | 0.301214 | Uiso ? C |
| C84 | 1.0 | 0.220442 | 0.445304 | 0.326677 | Uiso ? C |
| C85 | 1.0 | 0.726153 | 0.445327 | 0.326644 | Uiso ? C |
| C86 | 1.0 | 0.888403 | 0.443120 | 0.301181 | Uiso ? C |
| C87 | 1.0 | 0.055344 | 0.609492 | 0.292188 | Uiso ? C |
| C88 | 1.0 | 0.222893 | 0.609749 | 0.299918 | Uiso ? C |
| C89 | 1.0 | 0.383537 | 0.616913 | 0.337317 | Uiso ? C |
| C90 | 1.0 | 0.734768 | 0.616957 | 0.337312 | Uiso ? C |
| C91 | 1.0 | 0.888086 | 0.609763 | 0.299893 | Uiso ? C |
| C92 | 1.0 | 0.054916 | 0.776472 | 0.288968 | Uiso ? C |
| C93 | 1.0 | 0.222744 | 0.776466 | 0.288971 | Uiso ? C |
| C94 | 1.0 | 0.389720 | 0.776580 | 0.299828 | Uiso ? C |
| C95 | 1.0 | 0.554845 | 0.779680 | 0.326454 | Uiso ? C |
| C96 | 1.0 | 0.726146 | 0.779698 | 0.326448 | Uiso ? C |
| C97 | 1.0 | 0.888098 | 0.776603 | 0.299833 | Uiso ? C |
| C98 | 1.0 | 0.055361 | 0.943963 | 0.292207 | Uiso ? C |
| C99 | 1.0 | 0.222749 | 0.944316 | 0.289053 | Uiso ? C |

|      |     |          |          |          |          |
|------|-----|----------|----------|----------|----------|
| C100 | 1.0 | 0.389790 | 0.943960 | 0.292173 | Uiso ? C |
| C101 | 1.0 | 0.556386 | 0.943589 | 0.301007 | Uiso ? C |
| C102 | 1.0 | 0.721996 | 0.942754 | 0.309791 | Uiso ? C |
| C103 | 1.0 | 0.888424 | 0.943597 | 0.301054 | Uiso ? C |
| C104 | 1.0 | 0.113844 | 0.057962 | 0.479999 | Uiso ? C |
| C105 | 1.0 | 0.280277 | 0.058809 | 0.471267 | Uiso ? C |
| C106 | 1.0 | 0.445894 | 0.057984 | 0.480045 | Uiso ? C |
| C107 | 1.0 | 0.612487 | 0.057611 | 0.488874 | Uiso ? C |
| C108 | 1.0 | 0.779526 | 0.057252 | 0.491969 | Uiso ? C |
| C109 | 1.0 | 0.946904 | 0.057597 | 0.488810 | Uiso ? C |
| C110 | 1.0 | 0.114151 | 0.224947 | 0.481184 | Uiso ? C |
| C111 | 1.0 | 0.276124 | 0.221868 | 0.454633 | Uiso ? C |
| C112 | 1.0 | 0.447423 | 0.221903 | 0.454651 | Uiso ? C |
| C113 | 1.0 | 0.612552 | 0.224995 | 0.481255 | Uiso ? C |
| C114 | 1.0 | 0.779526 | 0.225096 | 0.492049 | Uiso ? C |
| C115 | 1.0 | 0.947338 | 0.225080 | 0.492000 | Uiso ? C |
| C116 | 1.0 | 0.114163 | 0.391786 | 0.481124 | Uiso ? C |
| C117 | 1.0 | 0.267525 | 0.384620 | 0.443775 | Uiso ? C |
| C118 | 1.0 | 0.618723 | 0.384670 | 0.443789 | Uiso ? C |
| C119 | 1.0 | 0.779374 | 0.391821 | 0.481170 | Uiso ? C |
| C120 | 1.0 | 0.946916 | 0.392065 | 0.488828 | Uiso ? C |
| C121 | 1.0 | 0.113862 | 0.558440 | 0.479876 | Uiso ? C |
| C122 | 1.0 | 0.276119 | 0.556240 | 0.454439 | Uiso ? C |
| C123 | 1.0 | 0.781822 | 0.556270 | 0.454434 | Uiso ? C |
| C124 | 1.0 | 0.946353 | 0.558455 | 0.479883 | Uiso ? C |
| C125 | 1.0 | 0.113199 | 0.724611 | 0.476579 | Uiso ? C |

|      |     |          |          |          |           |
|------|-----|----------|----------|----------|-----------|
| C126 | 1.0 | 0.280299 | 0.723828 | 0.471064 | Uiso ? C  |
| C127 | 1.0 | 0.447449 | 0.727558 | 0.454384 | Uiso ? C  |
| C128 | 1.0 | 0.618783 | 0.735886 | 0.443586 | Uiso ? C  |
| C129 | 1.0 | 0.781844 | 0.727584 | 0.454360 | Uiso ? C  |
| C130 | 1.0 | 0.945314 | 0.723849 | 0.471039 | Uiso ? C  |
| C131 | 1.0 | 0.113187 | 0.891065 | 0.476642 | Uiso ? C  |
| C132 | 1.0 | 0.279665 | 0.891064 | 0.476656 | Uiso ? C  |
| C133 | 1.0 | 0.445909 | 0.890450 | 0.479901 | Uiso ? C  |
| C134 | 1.0 | 0.612572 | 0.890160 | 0.481032 | Uiso ? C  |
| C135 | 1.0 | 0.779387 | 0.890167 | 0.481006 | Uiso ? C  |
| C136 | 1.0 | 0.946339 | 0.890456 | 0.479859 | Uiso ? C  |
| Eu1  | 1.0 | 0.501125 | 0.500778 | 0.390517 | Uiso ? Eu |

## 5. Eu-TBG.cif

#=====

# CRYSTAL DATA

#-----

data\_VESTA\_phase\_1

\_chemical\_name\_common        'Eu/TBG'

\_cell\_length\_a                16.931160

\_cell\_length\_b                16.904827

\_cell\_length\_c                22.296223

\_cell\_angle\_alpha             96.492416

\_cell\_angle\_beta              81.913322

\_cell\_angle\_gamma             118.406631

\_cell\_volume                  5549.578203

\_space\_group\_name\_H-M\_alt     'P 1'

\_space\_group\_IT\_number        1

loop\_

\_space\_group\_symop\_operation\_xyz

'x, y, z'

loop\_

\_atom\_site\_label

\_atom\_site\_occupancy

\_atom\_site\_fract\_x

\_atom\_site\_fract\_y

\_atom\_site\_fract\_z

\_atom\_site\_adp\_type

\_atom\_site\_U\_iso\_or\_equiv

\_atom\_site\_type\_symbol

|     |     |          |          |          |          |
|-----|-----|----------|----------|----------|----------|
| C1  | 1.0 | 0.017797 | 0.992793 | 0.965275 | Uiso ? C |
| C2  | 1.0 | 0.113396 | 0.040079 | 0.963764 | Uiso ? C |
| C3  | 1.0 | 0.160591 | 0.992374 | 0.970776 | Uiso ? C |
| C4  | 1.0 | 0.255655 | 0.040372 | 0.973204 | Uiso ? C |
| C5  | 1.0 | 0.300842 | 0.994201 | 0.987319 | Uiso ? C |
| C6  | 1.0 | 0.395213 | 0.042493 | 0.992482 | Uiso ? C |
| C7  | 1.0 | 0.440365 | 0.996405 | 0.006489 | Uiso ? C |
| C8  | 1.0 | 0.534532 | 0.044340 | 0.012054 | Uiso ? C |
| C9  | 1.0 | 0.582602 | 0.996075 | 0.013856 | Uiso ? C |
| C10 | 1.0 | 0.678364 | 0.043725 | 0.012162 | Uiso ? C |
| C11 | 1.0 | 0.727747 | 0.995265 | 0.999656 | Uiso ? C |
| C12 | 1.0 | 0.823603 | 0.042894 | 0.992297 | Uiso ? C |
| C13 | 1.0 | 0.872916 | 0.994508 | 0.977235 | Uiso ? C |
| C14 | 1.0 | 0.968758 | 0.041713 | 0.970985 | Uiso ? C |
| C15 | 1.0 | 0.015853 | 0.137399 | 0.975878 | Uiso ? C |
| C16 | 1.0 | 0.111883 | 0.184518 | 0.967795 | Uiso ? C |
| C17 | 1.0 | 0.161147 | 0.135549 | 0.961291 | Uiso ? C |
| C18 | 1.0 | 0.257098 | 0.182799 | 0.959315 | Uiso ? C |
| C19 | 1.0 | 0.304774 | 0.134840 | 0.965115 | Uiso ? C |
| C20 | 1.0 | 0.399419 | 0.182968 | 0.970101 | Uiso ? C |
| C21 | 1.0 | 0.444706 | 0.136749 | 0.984600 | Uiso ? C |

|     |     |          |          |          |          |
|-----|-----|----------|----------|----------|----------|
| C22 | 1.0 | 0.537126 | 0.185608 | 0.996133 | Uiso ? C |
| C23 | 1.0 | 0.582041 | 0.139463 | 0.010596 | Uiso ? C |
| C24 | 1.0 | 0.675968 | 0.187994 | 0.019047 | Uiso ? C |
| C25 | 1.0 | 0.724940 | 0.139181 | 0.017763 | Uiso ? C |
| C26 | 1.0 | 0.820798 | 0.186692 | 0.014268 | Uiso ? C |
| C27 | 1.0 | 0.870475 | 0.138303 | 0.000461 | Uiso ? C |
| C28 | 1.0 | 0.966464 | 0.185792 | 0.991612 | Uiso ? C |
| C29 | 1.0 | 0.013475 | 0.281207 | 0.998950 | Uiso ? C |
| C30 | 1.0 | 0.109319 | 0.328463 | 0.988553 | Uiso ? C |
| C31 | 1.0 | 0.158890 | 0.280238 | 0.971762 | Uiso ? C |
| C32 | 1.0 | 0.254975 | 0.327271 | 0.963876 | Uiso ? C |
| C33 | 1.0 | 0.304454 | 0.278441 | 0.958250 | Uiso ? C |
| C34 | 1.0 | 0.399928 | 0.325781 | 0.960389 | Uiso ? C |
| C35 | 1.0 | 0.447317 | 0.278124 | 0.967439 | Uiso ? C |
| C36 | 1.0 | 0.540340 | 0.326737 | 0.978591 | Uiso ? C |
| C37 | 1.0 | 0.584929 | 0.280755 | 0.994157 | Uiso ? C |
| C38 | 1.0 | 0.675751 | 0.330181 | 0.009888 | Uiso ? C |
| C39 | 1.0 | 0.722263 | 0.282928 | 0.021309 | Uiso ? C |
| C40 | 1.0 | 0.818088 | 0.331547 | 0.025328 | Uiso ? C |
| C41 | 1.0 | 0.867589 | 0.282480 | 0.019495 | Uiso ? C |
| C42 | 1.0 | 0.963615 | 0.329654 | 0.014094 | Uiso ? C |
| C43 | 1.0 | 0.010278 | 0.425257 | 0.019108 | Uiso ? C |
| C44 | 1.0 | 0.106573 | 0.472306 | 0.012411 | Uiso ? C |
| C45 | 1.0 | 0.156161 | 0.423945 | 0.996294 | Uiso ? C |
| C46 | 1.0 | 0.252062 | 0.471132 | 0.986663 | Uiso ? C |
| C47 | 1.0 | 0.301660 | 0.422905 | 0.970230 | Uiso ? C |

|     |     |          |          |          |          |
|-----|-----|----------|----------|----------|----------|
| C48 | 1.0 | 0.397690 | 0.470093 | 0.966625 | Uiso ? C |
| C49 | 1.0 | 0.447068 | 0.421516 | 0.962321 | Uiso ? C |
| C50 | 1.0 | 0.541871 | 0.469048 | 0.967077 | Uiso ? C |
| C51 | 1.0 | 0.588364 | 0.421729 | 0.976854 | Uiso ? C |
| C52 | 1.0 | 0.680161 | 0.470406 | 0.990667 | Uiso ? C |
| C53 | 1.0 | 0.721578 | 0.424565 | 0.009732 | Uiso ? C |
| C54 | 1.0 | 0.811602 | 0.477383 | 0.036095 | Uiso ? C |
| C55 | 1.0 | 0.865185 | 0.426291 | 0.028363 | Uiso ? C |
| C56 | 1.0 | 0.960184 | 0.473886 | 0.026431 | Uiso ? C |
| C57 | 1.0 | 0.008863 | 0.570379 | 0.025103 | Uiso ? C |
| C58 | 1.0 | 0.104092 | 0.616940 | 0.022773 | Uiso ? C |
| C59 | 1.0 | 0.153574 | 0.567923 | 0.017615 | Uiso ? C |
| C60 | 1.0 | 0.249486 | 0.614807 | 0.011148 | Uiso ? C |
| C61 | 1.0 | 0.298885 | 0.566339 | 0.996150 | Uiso ? C |
| C62 | 1.0 | 0.394891 | 0.613851 | 0.988906 | Uiso ? C |
| C63 | 1.0 | 0.444381 | 0.565548 | 0.974417 | Uiso ? C |
| C64 | 1.0 | 0.540220 | 0.612890 | 0.971383 | Uiso ? C |
| C65 | 1.0 | 0.589047 | 0.564384 | 0.968415 | Uiso ? C |
| C66 | 1.0 | 0.683995 | 0.611980 | 0.973045 | Uiso ? C |
| C67 | 1.0 | 0.729190 | 0.565795 | 0.985723 | Uiso ? C |
| C68 | 1.0 | 0.823471 | 0.614532 | 0.993585 | Uiso ? C |
| C69 | 1.0 | 0.867560 | 0.571575 | 0.012986 | Uiso ? C |
| C70 | 1.0 | 0.961718 | 0.618011 | 0.015934 | Uiso ? C |
| C71 | 1.0 | 0.011963 | 0.711169 | 0.003677 | Uiso ? C |
| C72 | 1.0 | 0.106725 | 0.759379 | 0.007085 | Uiso ? C |
| C73 | 1.0 | 0.152871 | 0.712390 | 0.017638 | Uiso ? C |

|     |     |          |          |          |          |
|-----|-----|----------|----------|----------|----------|
| C74 | 1.0 | 0.248319 | 0.759516 | 0.016767 | Uiso ? C |
| C75 | 1.0 | 0.296947 | 0.710657 | 0.014948 | Uiso ? C |
| C76 | 1.0 | 0.392613 | 0.757623 | 0.009926 | Uiso ? C |
| C77 | 1.0 | 0.441917 | 0.709042 | 0.997564 | Uiso ? C |
| C78 | 1.0 | 0.537882 | 0.756697 | 0.990697 | Uiso ? C |
| C79 | 1.0 | 0.587140 | 0.708502 | 0.977348 | Uiso ? C |
| C80 | 1.0 | 0.683106 | 0.755893 | 0.972655 | Uiso ? C |
| C81 | 1.0 | 0.731886 | 0.707451 | 0.970041 | Uiso ? C |
| C82 | 1.0 | 0.826962 | 0.754714 | 0.970964 | Uiso ? C |
| C83 | 1.0 | 0.873250 | 0.707964 | 0.982118 | Uiso ? C |
| C84 | 1.0 | 0.967288 | 0.756478 | 0.987361 | Uiso ? C |
| C85 | 1.0 | 0.016694 | 0.850290 | 0.977145 | Uiso ? C |
| C86 | 1.0 | 0.111275 | 0.898538 | 0.980640 | Uiso ? C |
| C87 | 1.0 | 0.156357 | 0.852760 | 0.995659 | Uiso ? C |
| C88 | 1.0 | 0.250989 | 0.900946 | 0.998818 | Uiso ? C |
| C89 | 1.0 | 0.296798 | 0.854190 | 0.010654 | Uiso ? C |
| C90 | 1.0 | 0.391915 | 0.901646 | 0.011818 | Uiso ? C |
| C91 | 1.0 | 0.439992 | 0.853295 | 0.012711 | Uiso ? C |
| C92 | 1.0 | 0.535710 | 0.900649 | 0.009843 | Uiso ? C |
| C93 | 1.0 | 0.585024 | 0.852166 | 0.998419 | Uiso ? C |
| C94 | 1.0 | 0.680761 | 0.899845 | 0.991326 | Uiso ? C |
| C95 | 1.0 | 0.730068 | 0.851508 | 0.977230 | Uiso ? C |
| C96 | 1.0 | 0.825904 | 0.898791 | 0.971802 | Uiso ? C |
| C97 | 1.0 | 0.874757 | 0.849925 | 0.967645 | Uiso ? C |
| C98 | 1.0 | 0.970061 | 0.897402 | 0.967892 | Uiso ? C |
| C99 | 1.0 | 0.742116 | 0.007591 | 0.170133 | Uiso ? C |

|      |     |          |          |          |          |
|------|-----|----------|----------|----------|----------|
| C100 | 1.0 | 0.570613 | 0.025892 | 0.172983 | Uiso ? C |
| C101 | 1.0 | 0.373793 | 0.143858 | 0.099885 | Uiso ? C |
| C102 | 1.0 | 0.659695 | 0.094959 | 0.185518 | Uiso ? C |
| C103 | 1.0 | 0.245036 | 0.006717 | 0.158391 | Uiso ? C |
| C104 | 1.0 | 0.337092 | 0.994416 | 0.157714 | Uiso ? C |
| C105 | 1.0 | 0.430189 | 0.069770 | 0.155718 | Uiso ? C |
| C106 | 1.0 | 0.516151 | 0.076422 | 0.170669 | Uiso ? C |
| C107 | 1.0 | 0.579243 | 0.170616 | 0.180515 | Uiso ? C |
| C108 | 1.0 | 0.264809 | 0.371767 | 0.095688 | Uiso ? C |
| C109 | 1.0 | 0.061888 | 0.021418 | 0.177227 | Uiso ? C |
| C110 | 1.0 | 0.152139 | 0.091790 | 0.170474 | Uiso ? C |
| C111 | 1.0 | 0.234539 | 0.086779 | 0.152431 | Uiso ? C |
| C112 | 1.0 | 0.308263 | 0.167185 | 0.128004 | Uiso ? C |
| C113 | 1.0 | 0.437681 | 0.152741 | 0.135318 | Uiso ? C |
| C114 | 1.0 | 0.493962 | 0.245924 | 0.157553 | Uiso ? C |
| C115 | 1.0 | 0.074776 | 0.177086 | 0.189404 | Uiso ? C |
| C116 | 1.0 | 0.159641 | 0.179542 | 0.176889 | Uiso ? C |
| C117 | 1.0 | 0.238126 | 0.258549 | 0.165569 | Uiso ? C |
| C118 | 1.0 | 0.318665 | 0.253769 | 0.144880 | Uiso ? C |
| C119 | 1.0 | 0.404789 | 0.335233 | 0.144932 | Uiso ? C |
| C120 | 1.0 | 0.834796 | 0.015954 | 0.170973 | Uiso ? C |
| C121 | 1.0 | 0.915065 | 0.091121 | 0.190876 | Uiso ? C |
| C122 | 1.0 | 0.002952 | 0.088731 | 0.189104 | Uiso ? C |
| C123 | 1.0 | 0.741133 | 0.090618 | 0.186171 | Uiso ? C |
| C124 | 1.0 | 0.823957 | 0.174036 | 0.196598 | Uiso ? C |
| C125 | 1.0 | 0.908779 | 0.175250 | 0.199426 | Uiso ? C |

|      |     |          |          |          |          |
|------|-----|----------|----------|----------|----------|
| C126 | 1.0 | 0.987356 | 0.261201 | 0.201615 | Uiso ? C |
| C127 | 1.0 | 0.662551 | 0.179396 | 0.191203 | Uiso ? C |
| C128 | 1.0 | 0.740482 | 0.260596 | 0.195478 | Uiso ? C |
| C129 | 1.0 | 0.822749 | 0.259365 | 0.199742 | Uiso ? C |
| C130 | 1.0 | 0.902098 | 0.344232 | 0.201351 | Uiso ? C |
| C131 | 1.0 | 0.985611 | 0.344924 | 0.201181 | Uiso ? C |
| C132 | 1.0 | 0.573390 | 0.251291 | 0.175546 | Uiso ? C |
| C133 | 1.0 | 0.652219 | 0.336650 | 0.178077 | Uiso ? C |
| C134 | 1.0 | 0.736710 | 0.340871 | 0.187747 | Uiso ? C |
| C135 | 1.0 | 0.816995 | 0.421228 | 0.185605 | Uiso ? C |
| C136 | 1.0 | 0.899396 | 0.426831 | 0.195630 | Uiso ? C |
| C137 | 1.0 | 0.980349 | 0.512787 | 0.192076 | Uiso ? C |
| C138 | 1.0 | 0.484914 | 0.328549 | 0.152425 | Uiso ? C |
| C139 | 1.0 | 0.563600 | 0.413183 | 0.160232 | Uiso ? C |
| C140 | 1.0 | 0.645932 | 0.413495 | 0.166602 | Uiso ? C |
| C141 | 1.0 | 0.728280 | 0.497955 | 0.154451 | Uiso ? C |
| C142 | 1.0 | 0.820434 | 0.500774 | 0.163551 | Uiso ? C |
| C143 | 1.0 | 0.892843 | 0.588773 | 0.182683 | Uiso ? C |
| C144 | 1.0 | 0.977873 | 0.596161 | 0.187507 | Uiso ? C |
| C145 | 1.0 | 0.071435 | 0.261399 | 0.194705 | Uiso ? C |
| C146 | 1.0 | 0.150870 | 0.344281 | 0.184774 | Uiso ? C |
| C147 | 1.0 | 0.232557 | 0.339951 | 0.162432 | Uiso ? C |
| C148 | 1.0 | 0.319859 | 0.426045 | 0.147983 | Uiso ? C |
| C149 | 1.0 | 0.066271 | 0.428655 | 0.194132 | Uiso ? C |
| C150 | 1.0 | 0.149860 | 0.428086 | 0.185136 | Uiso ? C |
| C151 | 1.0 | 0.231696 | 0.511809 | 0.175166 | Uiso ? C |

|      |     |          |          |          |          |
|------|-----|----------|----------|----------|----------|
| C152 | 1.0 | 0.063239 | 0.511804 | 0.191011 | Uiso ? C |
| C153 | 1.0 | 0.142477 | 0.595211 | 0.183961 | Uiso ? C |
| C154 | 1.0 | 0.053675 | 0.684568 | 0.181524 | Uiso ? C |
| C155 | 1.0 | 0.403077 | 0.419417 | 0.150245 | Uiso ? C |
| C156 | 1.0 | 0.481909 | 0.502981 | 0.155571 | Uiso ? C |
| C157 | 1.0 | 0.561893 | 0.498217 | 0.158966 | Uiso ? C |
| C158 | 1.0 | 0.641524 | 0.582205 | 0.163366 | Uiso ? C |
| C159 | 1.0 | 0.791988 | 0.493445 | 0.103660 | Uiso ? C |
| C160 | 1.0 | 0.804046 | 0.663759 | 0.170604 | Uiso ? C |
| C161 | 1.0 | 0.879581 | 0.660509 | 0.183640 | Uiso ? C |
| C162 | 1.0 | 0.316241 | 0.512036 | 0.163730 | Uiso ? C |
| C163 | 1.0 | 0.397527 | 0.593869 | 0.161499 | Uiso ? C |
| C164 | 1.0 | 0.480258 | 0.589329 | 0.157316 | Uiso ? C |
| C165 | 1.0 | 0.560386 | 0.672316 | 0.156992 | Uiso ? C |
| C166 | 1.0 | 0.641573 | 0.665999 | 0.159784 | Uiso ? C |
| C167 | 1.0 | 0.726066 | 0.743575 | 0.150082 | Uiso ? C |
| C168 | 1.0 | 0.812755 | 0.746408 | 0.156646 | Uiso ? C |
| C169 | 1.0 | 0.905804 | 0.823514 | 0.152578 | Uiso ? C |
| C170 | 1.0 | 0.996250 | 0.837164 | 0.167753 | Uiso ? C |
| C171 | 1.0 | 0.228255 | 0.595295 | 0.177603 | Uiso ? C |
| C172 | 1.0 | 0.311155 | 0.677860 | 0.171450 | Uiso ? C |
| C173 | 1.0 | 0.396006 | 0.679410 | 0.165169 | Uiso ? C |
| C174 | 1.0 | 0.475749 | 0.765719 | 0.161598 | Uiso ? C |
| C175 | 1.0 | 0.559413 | 0.759387 | 0.155752 | Uiso ? C |
| C176 | 1.0 | 0.644249 | 0.837562 | 0.147394 | Uiso ? C |
| C177 | 1.0 | 0.720234 | 0.818671 | 0.132641 | Uiso ? C |

|      |     |          |          |          |           |
|------|-----|----------|----------|----------|-----------|
| C178 | 1.0 | 0.860313 | 0.956679 | 0.137661 | Uiso ? C  |
| C179 | 1.0 | 0.891539 | 0.890867 | 0.127940 | Uiso ? C  |
| C180 | 1.0 | 0.723578 | 0.582932 | 0.165465 | Uiso ? C  |
| C181 | 1.0 | 0.137219 | 0.678129 | 0.180980 | Uiso ? C  |
| C182 | 1.0 | 0.220490 | 0.754857 | 0.175539 | Uiso ? C  |
| C183 | 1.0 | 0.307400 | 0.759638 | 0.171482 | Uiso ? C  |
| C184 | 1.0 | 0.380007 | 0.849314 | 0.166189 | Uiso ? C  |
| C185 | 1.0 | 0.473131 | 0.853432 | 0.162727 | Uiso ? C  |
| C186 | 1.0 | 0.563111 | 0.935448 | 0.164052 | Uiso ? C  |
| C187 | 1.0 | 0.651228 | 0.928116 | 0.158439 | Uiso ? C  |
| C188 | 1.0 | 0.056685 | 0.776005 | 0.174370 | Uiso ? C  |
| C189 | 1.0 | 0.147047 | 0.847716 | 0.172896 | Uiso ? C  |
| C190 | 1.0 | 0.227697 | 0.839383 | 0.172184 | Uiso ? C  |
| C191 | 1.0 | 0.322457 | 0.905451 | 0.165890 | Uiso ? C  |
| C192 | 1.0 | 0.807596 | 0.876546 | 0.110897 | Uiso ? C  |
| C193 | 1.0 | 0.064662 | 0.932333 | 0.171460 | Uiso ? C  |
| C194 | 1.0 | 0.156010 | 0.934970 | 0.169265 | Uiso ? C  |
| Eu1  | 1.0 | 0.347159 | 0.156595 | 0.231069 | Uiso ? Eu |
